# Supplementary material
Source: publisher figshare collection journal article supplement (https://tandf.figshare.com/articles/dataset/_/5107141)
Supplement: Supplementary file 1 [file 1]

**Supplementary Table 2.** The coordinate of the optimal point for the electrode insertion at different angle in the craniocaudal and orbital planes.

| Craniocaudal<br>Plane Angle | Orbital Plane Angle                      |   |     |     |     |     |     |     |     |    |     |     |      |   |   |      |     |     |      |  |  |
|-----------------------------|------------------------------------------|---|-----|-----|-----|-----|-----|-----|-----|----|-----|-----|------|---|---|------|-----|-----|------|--|--|
|                             | 90°                                      |   |     | 60° |     |     | 30° |     |     | 0° |     |     | -30° |   |   | -60° |     |     | -90° |  |  |
|                             | (X, Y, Z) in Cartesian coordinate System |   |     |     |     |     |     |     |     |    |     |     |      |   |   |      |     |     |      |  |  |
|                             | x                                        | y | z   | x   | y   | z   | x   | y   | z   | x  | y   | z   | x    | y | z | x    | y   | z   |      |  |  |
| 90°                         | 0                                        | 0 | 0   | 0   | 0   | 0   | 0   | 0   | 0   | 0  | 0   | 0   | 0    | 0 | 0 | 0    | 0   | 0   |      |  |  |
|                             | 0                                        | 0 | 0.2 | 0   | 0.2 | 0.4 | 0   | 0.4 | 0.2 | 0  | 0.2 | 0   | -    | - | - | -    | 0   | 0.2 |      |  |  |
|                             | 0                                        | 0 | 0.4 | 0   | 0.4 | 0.6 | 0   | 0.6 | 0.4 | 0  | 0.4 | 0   | -    | - | - | -    | 0   | 0.4 |      |  |  |
|                             | 0                                        | 0 | 0.6 | 0   | 0.4 | 0.8 | 0   | 0.8 | 0.4 | 0  | 0.6 | 0   | -    | - | - | -    | 0   | 0.6 |      |  |  |
|                             | 0                                        | 0 | 0.8 | -   | -   | -   | -   | -   | -   | 0  | 0.8 | 0   | -    | - | - | -    | 0   | 0.8 |      |  |  |
| 60°                         | 0                                        | 0 | 0   | 0   | 0   | 0   | 0   | 0   | 0   | 0  | 0   | 0   | 0    | 0 | 0 | 0    | 0   | 0   |      |  |  |
|                             | 0.2                                      | 0 | 0.4 | 0.4 | 0.4 | 0.6 | 0.2 | 0.8 | 0   | 0  | 0.2 | 0   | -    | - | - | -    | 0.2 | 0.4 |      |  |  |
|                             | 0.4                                      | 0 | 0.6 | -   | -   | -   | -   | -   | -   | 0  | 0.4 | 0   | -    | - | - | -    | 0.4 | 0.6 |      |  |  |
|                             | 0.4                                      | 0 | 0.8 | -   | -   | -   | -   | -   | -   | 0  | 0.6 | 0   | -    | - | - | -    | 0.4 | 0.8 |      |  |  |
| 30°                         | 0                                        | 0 | 0   | 0   | 0   | 0   | 0   | 0   | 0   | 0  | 0   | 0   | 0    | 0 | 0 | 0    | 0   | 0   |      |  |  |
|                             | 0.4                                      | 0 | 0.2 | 0.6 | 0.4 | 0.4 | 0.4 | 0.8 | 0.2 | 0  | 0.2 | 0   | -    | - | - | -    | 0.4 | 0.2 |      |  |  |
|                             | 0.6                                      | 0 | 0.4 | -   | -   | -   | -   | -   | -   | 0  | 0.4 | 0   | -    | - | - | -    | 0.6 | 0.4 |      |  |  |
|                             | 0.8                                      | 0 | 0.4 | -   | -   | -   | -   | -   | -   | 0  | 0.6 | 0   | -    | - | - | -    | 0.8 | 0.4 |      |  |  |
|                             | -                                        | - | -   | -   | -   | -   | -   | -   | -   | 0  | 0.8 | 0   | -    | - | - | -    | -   | -   |      |  |  |
| 0°                          | 0                                        | 0 | 0   | 0   | 0   | 0   | 0   | 0   | 0   | 0  | 0   | 0   | 0    | 0 | 0 | 0    | 0   | 0   |      |  |  |
|                             | 0.2                                      | 0 | 0   | 0.4 | 0   | 0.2 | 0.2 | 0   | 0.4 | 0  | 0   | 0.2 | -    | - | - | -    | 0.2 | 0   |      |  |  |
|                             | 0.4                                      | 0 | 0   | 0.6 | 0   | 0.4 | 0.4 | 0   | 0.4 | 0  | 0   | 0.4 | -    | - | - | -    | 0.4 | 0   |      |  |  |
|                             | 0.6                                      | 0 | 0   | 0.8 | 0   | 0.4 | 0.4 | 0   | 0.6 | 0  | 0   | 0.6 | -    | - | - | -    | 0.6 | 0   |      |  |  |
|                             | 0.8                                      | 0 | 0   | -   | -   | -   | 0.4 | 0   | 0.8 | 0  | 0   | 0.8 | -    | - | - | -    | 0.8 | 0   |      |  |  |

### **Supplementary Table 2 Continued**

| Craniocaudal<br>Plane Angle | Orbital Plane Angle                      |   |     |     |   |   |     |   |   |    |     |   |      |     |     |      |   |     |      |  |  |
|-----------------------------|------------------------------------------|---|-----|-----|---|---|-----|---|---|----|-----|---|------|-----|-----|------|---|-----|------|--|--|
|                             | 90°                                      |   |     | 60° |   |   | 30° |   |   | 0° |     |   | -30° |     |     | -60° |   |     | -90° |  |  |
|                             | (X, Y, Z) in Cartesian coordinate System |   |     |     |   |   |     |   |   |    |     |   |      |     |     |      |   |     |      |  |  |
|                             | x                                        | y | z   | x   | y | z | x   | y | z | x  | y   | z | x    | y   | z   | x    | y | z   |      |  |  |
| -30°                        | 0                                        | 0 | 0   | 0   | 0 | 0 | 0   | 0 | 0 | 0  | 0   | 0 | 0    | 0   | 0   | 0    | 0 | 0   |      |  |  |
|                             | -                                        | - | -   | -   | - | - | -   | - | - | 0  | 0.2 | 0 | -    | -   | -   | -    | - | -   |      |  |  |
|                             | -                                        | - | -   | -   | - | - | -   | - | - | 0  | 0.4 | 0 | -    | -   | -   | -    | - | -   |      |  |  |
|                             | -                                        | - | -   | -   | - | - | -   | - | - | 0  | 0.6 | 0 | -    | -   | -   | -    | - | -   |      |  |  |
|                             | -                                        | - | -   | -   | - | - | -   | - | - | 0  | 0.8 | 0 | -    | -   | -   | -    | - | -   |      |  |  |
| -60°                        | 0                                        | 0 | 0   | 0   | 0 | 0 | 0   | 0 | 0 | 0  | 0   | 0 | 0    | 0   | 0   | 0    | 0 | 0   |      |  |  |
|                             | -                                        | - | -   | -   | - | - | -   | - | - | 0  | 0.2 | 0 | -    | -   | -   | -    | - | -   |      |  |  |
|                             | -                                        | - | -   | -   | - | - | -   | - | - | 0  | 0.4 | 0 | -    | -   | -   | -    | - | -   |      |  |  |
|                             | -                                        | - | -   | -   | - | - | -   | - | - | 0  | 0.6 | 0 | -    | -   | -   | -    | - | -   |      |  |  |
|                             | -                                        | - | -   | -   | - | - | -   | - | - | 0  | 0.8 | 0 | -    | -   | -   | -    | - | -   |      |  |  |
| -90°                        | 0                                        | 0 | 0   | 0   | 0 | 0 | 0   | 0 | 0 | 0  | 0   | 0 | 0    | 0   | 0   | 0    | 0 | 0   |      |  |  |
|                             | 0                                        | 0 | 0.2 | -   | - | - | -   | - | - | 0  | 0.2 | 0 | 0    | 0.4 | 0.2 | 0    | 0 | 0.2 |      |  |  |
|                             | 0                                        | 0 | 0.4 | -   | - | - | -   | - | - | 0  | 0.4 | 0 | 0    | 0.6 | 0.4 | 0    | 0 | 0.4 |      |  |  |
|                             | 0                                        | 0 | 0.6 | -   | - | - | -   | - | - | 0  | 0.6 | 0 | 0    | 0.8 | 0   | 0    | 0 | 0.6 |      |  |  |
|                             | 0                                        | 0 | 0.8 | -   | - | - | -   | - | - | 0  | 0.8 | 0 | -    | -   | -   | -    | 0 | 0   |      |  |  |
