# Supplementary material
Source: publisher figshare collection journal article supplement (https://tandf.figshare.com/articles/dataset/_/5107141)
Supplement: Supplementary file 2 [file 1]

**Supplementary Table 1.** The ablated volume of the tumor in cm<sup>3</sup> for 86 different points (*i.e.* the electrode passageway location) and for 49 different angles of the electrode insertion in combination of the craniocaudal and the orbital planes. The red number represents the optimal point.

| Craniocaudal Plane Angle | No. | Position of Electrode-Tip (cm) |     |     | Orbital Plane Angle               |       |       |       |       |       |       |
|--------------------------|-----|--------------------------------|-----|-----|-----------------------------------|-------|-------|-------|-------|-------|-------|
|                          |     | Y                              | Z   | X   | 90°                               | 60°   | 30°   | 0°    | -30°  | -60°  | -90°  |
|                          |     |                                |     |     | Ablated Volume (cm <sup>3</sup> ) |       |       |       |       |       |       |
| 0°                       | 1   | 0                              | 0   | 0   | 14.05                             | 14.05 | 14.05 | 14.05 | 14.05 | 14.05 | 14.05 |
|                          | 2   | 0                              | 0   | 0.2 | 14.05                             | 13.97 | 13.69 | 13.57 | 13.71 | 13.97 | 14.05 |
|                          | 3   | 0                              | 0   | 0.4 | 14.05                             | 13.58 | 12.73 | 12.40 | 12.75 | 13.57 | 14.05 |
|                          | 4   | 0                              | 0   | 0.6 | 14.05                             | 13.03 | 11.57 | 11.01 | 11.59 | 13.01 | 14.05 |
|                          | 5   | 0                              | 0   | 0.8 | 14.05                             | 12.40 | 10.35 | 9.55  | 10.36 | 12.40 | 14.05 |
|                          | 6   | 0                              | 0.2 | 0   | 13.57                             | 13.71 | 13.98 | 14.05 | 13.97 | 13.69 | 13.57 |
|                          | 7   | 0                              | 0.2 | 0.2 | 13.57                             | 14.03 | 14.03 | 13.57 | 13.18 | 13.17 | 13.57 |
|                          | 8   | 0                              | 0.2 | 0.4 | 13.57                             | 14.05 | 13.32 | 12.39 | 12.09 | 12.62 | 13.57 |
|                          | 9   | 0                              | 0.2 | 0.6 | 13.57                             | 13.89 | 12.26 | 11.01 | 10.88 | 11.90 | 13.57 |
|                          | 10  | 0                              | 0.2 | 0.8 | 13.57                             | 13.44 | 11.06 | 9.55  | 9.63  | 11.20 | 13.57 |
|                          | 11  | 0                              | 0.4 | 0   | 12.38                             | 12.73 | 13.58 | 14.05 | 13.58 | 12.73 | 12.39 |
|                          | 12  | 0                              | 0.4 | 0.2 | 12.38                             | 13.32 | 14.05 | 13.57 | 12.57 | 12.08 | 12.39 |
|                          | 13  | 0                              | 0.4 | 0.4 | 12.38                             | 13.81 | 14.05 | 12.39 | 11.41 | 11.39 | 12.39 |
|                          | 14  | 0                              | 0.4 | 0.6 | 12.38                             | 14.05 | 12.90 | 11.01 | 10.16 | 10.68 | 12.39 |
|                          | 15  | 0                              | 0.4 | 0.8 | 12.38                             | 14.05 | 11.76 | 9.55  | 8.88  | 9.95  | 12.39 |
|                          | 16  | 0                              | 0.6 | 0   | 10.97                             | 11.57 | 13.03 | 14.05 | 13.03 | 11.57 | 10.97 |
|                          | 17  | 0                              | 0.6 | 0.2 | 10.97                             | 12.26 | 13.89 | 13.57 | 11.91 | 10.87 | 10.97 |
|                          | 18  | 0                              | 0.6 | 0.4 | 10.97                             | 12.90 | 14.05 | 12.40 | 10.69 | 10.15 | 10.97 |
|                          | 19  | 0                              | 0.6 | 0.6 | 10.97                             | 13.47 | 13.47 | 11.01 | 9.43  | 9.41  | 10.97 |
|                          | 20  | 0                              | 0.8 | 0   | 9.54                              | 10.35 | 12.40 | 14.05 | 12.40 | 10.35 | 9.54  |
|                          | 21  | 0                              | 0.8 | 0.2 | 9.54                              | 11.06 | 13.44 | 13.57 | 11.22 | 9.62  | 9.54  |
|                          | 22  | 0                              | 0.8 | 0.4 | 9.54                              | 11.76 | 14.05 | 12.39 | 9.97  | 8.87  | 9.54  |
|                          | 23  | 0.2                            | 0   | 0   | 13.57                             | 13.57 | 13.57 | 13.57 | 13.57 | 13.57 | 13.57 |
|                          | 24  | 0.2                            | 0   | 0.2 | 13.57                             | 13.45 | 13.22 | 13.11 | 13.23 | 13.45 | 13.57 |
|                          | 25  | 0.2                            | 0   | 0.4 | 13.57                             | 13.13 | 12.38 | 12.07 | 12.39 | 13.12 | 13.57 |
|                          | 26  | 0.2                            | 0   | 0.6 | 13.57                             | 13.24 | 11.31 | 10.77 | 11.32 | 12.64 | 13.57 |
|                          | 27  | 0.2                            | 0   | 0.8 | 13.57                             | 12.08 | 10.13 | 9.36  | 10.14 | 12.38 | 13.57 |
|                          | 28  | 0.2                            | 0.2 | 0   | 13.11                             | 13.22 | 13.45 | 13.57 | 13.45 | 11.53 | 13.11 |
|                          | 29  | 0.2                            | 0.2 | 0.2 | 13.11                             | 13.50 | 13.50 | 13.11 | 12.79 | 12.78 | 13.11 |
|                          | 30  | 0.2                            | 0.2 | 0.4 | 13.11                             | 13.56 | 12.91 | 12.07 | 11.80 | 12.23 | 13.11 |
|                          | 31  | 0.2                            | 0.2 | 0.6 | 13.11                             | 13.38 | 11.95 | 10.77 | 10.65 | 11.62 | 13.11 |
|                          | 32  | 0.2                            | 0.2 | 0.8 | 13.11                             | 13.01 | 10.82 | 9.36  | 9.43  | 10.96 | 13.11 |
|                          | 33  | 0.2                            | 0.4 | 0   | 12.07                             | 12.38 | 13.12 | 13.57 | 13.13 | 12.38 | 12.07 |
|                          | 34  | 0.2                            | 0.4 | 0.2 | 12.07                             | 12.91 | 13.56 | 13.11 | 12.24 | 11.78 | 12.07 |
|                          | 35  | 0.2                            | 0.4 | 0.4 | 12.07                             | 13.32 | 13.32 | 12.07 | 11.15 | 11.14 | 12.07 |
|                          | 36  | 0.2                            | 0.4 | 0.6 | 12.07                             | 13.54 | 12.53 | 10.77 | 9.95  | 10.45 | 12.07 |
|                          | 37  | 0.2                            | 0.4 | 0.8 | 12.07                             | 13.53 | 11.49 | 9.36  | 8.71  | 9.75  | 12.07 |
|                          | 38  | 0.2                            | 0.6 | 0   | 10.76                             | 11.31 | 12.65 | 13.57 | 12.65 | 11.31 | 10.77 |
|                          | 39  | 0.2                            | 0.6 | 0.2 | 10.76                             | 11.95 | 13.38 | 13.11 | 11.63 | 10.64 | 10.77 |

**Supplementary Table 1 Continued**

| Craniocaudal Plane Angle | No. | Position of Electrode -Tip (cm) |     |     | Orbital Plane Angle               |       |       |       |       |       |       |
|--------------------------|-----|---------------------------------|-----|-----|-----------------------------------|-------|-------|-------|-------|-------|-------|
|                          |     | Y                               | Z   | X   | 90°                               | 60°   | 30°   | 0°    | -30°  | -60°  | -90°  |
|                          |     |                                 |     |     | Ablated Volume (cm <sup>3</sup> ) |       |       |       |       |       |       |
| 0°                       | 40  | 0.2                             | 0.6 | 0.4 | 10.76                             | 12.53 | 13.54 | 12.07 | 10.47 | 9.94  | 10.77 |
|                          | 41  | 0.2                             | 0.6 | 0.6 | 10.76                             | 13.03 | 10.88 | 10.77 | 9.24  | 9.23  | 10.77 |
|                          | 42  | 0.2                             | 0.8 | 0   | 9.36                              | 10.13 | 12.08 | 13.57 | 11.88 | 10.13 | 9.36  |
|                          | 43  | 0.2                             | 0.8 | 0.2 | 9.36                              | 10.82 | 13.01 | 13.11 | 10.97 | 9.42  | 9.36  |
|                          | 44  | 0.2                             | 0.8 | 0.4 | 9.36                              | 11.49 | 13.53 | 12.07 | 9.76  | 8.70  | 9.36  |
|                          | 45  | 0.4                             | 0   | 0   | 12.36                             | 12.36 | 12.36 | 12.35 | 12.36 | 12.36 | 12.35 |
|                          | 46  | 0.4                             | 0   | 0.2 | 12.36                             | 12.28 | 12.11 | 12.03 | 12.12 | 12.27 | 12.35 |
|                          | 47  | 0.4                             | 0   | 0.4 | 12.36                             | 12.04 | 11.47 | 11.20 | 11.48 | 12.04 | 12.35 |
|                          | 48  | 0.4                             | 0   | 0.6 | 12.36                             | 11.68 | 10.55 | 10.07 | 10.57 | 11.67 | 12.35 |
|                          | 49  | 0.4                             | 0   | 0.8 | 12.36                             | 11.22 | 9.48  | 8.76  | 9.50  | 11.21 | 12.35 |
|                          | 50  | 0.4                             | 0.2 | 0   | 12.03                             | 12.11 | 12.63 | 12.35 | 12.34 | 12.11 | 12.03 |
|                          | 51  | 0.4                             | 0.2 | 0.2 | 12.03                             | 12.31 | 12.31 | 12.03 | 11.79 | 11.78 | 12.03 |
|                          | 52  | 0.4                             | 0.2 | 0.4 | 12.03                             | 12.35 | 11.88 | 11.20 | 10.97 | 11.34 | 12.03 |
|                          | 53  | 0.4                             | 0.2 | 0.6 | 12.03                             | 12.23 | 11.11 | 10.07 | 9.96  | 10.82 | 12.03 |
|                          | 54  | 0.4                             | 0.2 | 0.8 | 12.03                             | 11.96 | 10.11 | 8.76  | 8.83  | 10.24 | 12.03 |
|                          | 55  | 0.4                             | 0.4 | 0   | 11.20                             | 11.47 | 12.04 | 12.35 | 12.04 | 11.47 | 11.20 |
|                          | 56  | 0.4                             | 0.4 | 0.2 | 11.20                             | 11.88 | 12.35 | 12.03 | 11.35 | 10.96 | 11.20 |
|                          | 57  | 0.4                             | 0.4 | 0.4 | 11.20                             | 12.18 | 12.18 | 11.20 | 10.41 | 10.40 | 11.20 |
|                          | 58  | 0.4                             | 0.4 | 0.6 | 11.20                             | 12.34 | 11.59 | 10.07 | 9.32  | 9.78  | 11.20 |
|                          | 59  | 0.4                             | 0.6 | 0   | 10.07                             | 10.55 | 11.68 | 12.35 | 11.68 | 10.55 | 10.07 |
|                          | 60  | 0.4                             | 0.6 | 0.2 | 10.07                             | 11.11 | 12.23 | 12.03 | 10.83 | 9.95  | 10.07 |
|                          | 61  | 0.4                             | 0.6 | 0.4 | 10.07                             | 11.59 | 12.34 | 11.20 | 9.80  | 9.31  | 10.07 |
|                          | 62  | 0.4                             | 0.8 | 0   | 8.76                              | 9.48  | 11.22 | 12.35 | 11.22 | 9.48  | 8.76  |
|                          | 63  | 0.4                             | 0.8 | 0.2 | 8.76                              | 10.12 | 11.96 | 12.03 | 10.25 | 8.82  | 8.76  |
|                          | 64  | 0.6                             | 0   | 0   | 10.90                             | 10.91 | 10.91 | 10.90 | 10.91 | 10.91 | 10.90 |
|                          | 65  | 0.6                             | 0   | 0.2 | 10.90                             | 10.85 | 10.73 | 10.66 | 10.73 | 10.85 | 10.90 |
|                          | 66  | 0.6                             | 0   | 0.4 | 10.90                             | 10.67 | 10.22 | 10.01 | 10.23 | 10.67 | 10.90 |
|                          | 67  | 0.6                             | 0   | 0.6 | 10.90                             | 10.39 | 9.47  | 9.03  | 9.47  | 10.45 | 10.90 |
|                          | 68  | 0.6                             | 0.2 | 0   | 10.66                             | 10.73 | 10.85 | 10.90 | 10.85 | 10.73 | 10.65 |
|                          | 69  | 0.6                             | 0.2 | 0.2 | 10.66                             | 11.70 | 10.88 | 10.66 | 10.48 | 10.47 | 10.65 |
|                          | 70  | 0.6                             | 0.2 | 0.4 | 10.66                             | 10.90 | 10.55 | 10.01 | 9.82  | 11.12 | 10.65 |
|                          | 71  | 0.6                             | 0.2 | 0.6 | 10.66                             | 10.81 | 9.93  | 9.03  | 8.95  | 9.69  | 10.65 |
|                          | 72  | 0.6                             | 0.4 | 0   | 10.01                             | 10.22 | 10.67 | 10.90 | 10.67 | 10.22 | 10.01 |
|                          | 73  | 0.6                             | 0.4 | 0.2 | 10.01                             | 10.55 | 10.90 | 10.66 | 10.13 | 9.81  | 10.01 |
|                          | 74  | 0.6                             | 0.4 | 0.4 | 10.01                             | 10.78 | 10.78 | 10.01 | 9.34  | 9.33  | 10.01 |
|                          | 75  | 0.6                             | 0.4 | 0.6 | 10.01                             | 10.90 | 10.32 | 9.03  | 8.38  | 8.79  | 10.01 |
|                          | 76  | 0.6                             | 0.6 | 0   | 9.03                              | 9.47  | 10.39 | 10.90 | 10.39 | 9.47  | 9.03  |
|                          | 77  | 0.6                             | 0.6 | 0.2 | 9.03                              | 9.93  | 10.81 | 10.66 | 9.70  | 8.94  | 9.03  |
|                          | 78  | 0.6                             | 0.6 | 0.4 | 9.03                              | 10.32 | 10.90 | 10.01 | 8.80  | 8.33  | 9.03  |
|                          | 79  | 0.8                             | 0   | 0   | 9.18                              | 9.19  | 10.29 | 9.18  | 9.22  | 9.19  | 9.18  |
|                          | 80  | 0.8                             | 0   | 0.2 | 9.18                              | 9.14  | 9.04  | 8.98  | 9.05  | 9.14  | 9.18  |
|                          | 81  | 0.8                             | 0   | 0.4 | 9.18                              | 9.00  | 8.63  | 8.43  | 8.63  | 8.99  | 9.18  |

**Supplementary Table 1 Continued**

| Craniocaudal Plane Angle | No. | Position of Electrode-Tip (cm) |     |     | Orbital Plane Angle               |       |       |       |       |       |       |
|--------------------------|-----|--------------------------------|-----|-----|-----------------------------------|-------|-------|-------|-------|-------|-------|
|                          |     | Y                              | Z   | X   | 90°                               | 60°   | 30°   | 0°    | -30°  | -60°  | -90°  |
|                          |     |                                |     |     | Ablated Volume (cm <sup>3</sup> ) |       |       |       |       |       |       |
| 0°                       | 82  | 0.8                            | 0.2 | 0   | 8.98                              | 9.04  | 9.14  | 9.18  | 9.14  | 9.04  | 8.98  |
|                          | 83  | 0.8                            | 0.2 | 0.2 | 8.98                              | 9.16  | 9.16  | 8.98  | 8.84  | 8.83  | 8.98  |
|                          | 84  | 0.8                            | 0.2 | 0.4 | 8.98                              | 9.19  | 8.90  | 8.43  | 8.28  | 9.93  | 8.98  |
|                          | 85  | 0.8                            | 0.4 | 0   | 8.44                              | 8.63  | 9.00  | 9.18  | 9.00  | 8.63  | 8.44  |
|                          | 86  | 0.8                            | 0.4 | 0.2 | 8.44                              | 8.90  | 9.19  | 8.98  | 8.49  | 8.28  | 8.44  |
|                          | 87  | 0                              | 0   | 0   | 14.05                             | 14.05 | 14.05 | 14.05 | 14.05 | 14.05 | 14.05 |
| - 30°                    | 88  | 0                              | 0   | 0.2 | 13.98                             | 13.87 | 13.66 | 13.57 | 13.67 | 13.87 | 13.97 |
|                          | 89  | 0                              | 0   | 0.4 | 13.57                             | 13.23 | 12.64 | 12.39 | 12.64 | 13.23 | 13.57 |
|                          | 90  | 0                              | 0   | 0.6 | 13.04                             | 12.41 | 11.42 | 10.99 | 11.50 | 12.41 | 13.02 |
|                          | 91  | 0                              | 0   | 0.8 | 12.46                             | 11.50 | 10.10 | 9.50  | 10.10 | 11.51 | 12.39 |
|                          | 92  | 0                              | 0.2 | 0   | 13.70                             | 13.67 | 13.60 | 13.57 | 13.60 | 13.67 | 13.70 |
|                          | 93  | 0                              | 0.2 | 0.2 | 14.03                             | 13.78 | 13.32 | 13.12 | 13.32 | 13.78 | 14.03 |
|                          | 94  | 0                              | 0.2 | 0.4 | 14.05                             | 13.45 | 12.47 | 12.07 | 12.47 | 13.45 | 14.05 |
|                          | 95  | 0                              | 0.2 | 0.6 | 13.89                             | 12.81 | 11.35 | 10.76 | 11.35 | 12.80 | 13.89 |
|                          | 96  | 0                              | 0.2 | 0.8 | 13.44                             | 12.01 | 10.09 | 9.67  | 10.09 | 12.01 | 13.43 |
|                          | 97  | 0                              | 0.4 | 0   | 12.73                             | 12.65 | 12.47 | 12.39 | 12.47 | 12.65 | 12.73 |
|                          | 98  | 0                              | 0.4 | 0.2 | 13.33                             | 12.97 | 12.34 | 12.07 | 12.35 | 12.96 | 13.33 |
|                          | 99  | 0                              | 0.4 | 0.4 | 13.81                             | 12.96 | 11.74 | 11.24 | 11.74 | 12.96 | 13.81 |
|                          | 100 | 0                              | 0.4 | 0.6 | 14.05                             | 12.63 | 10.82 | 10.10 | 10.82 | 12.63 | 14.05 |
|                          | 101 | 0                              | 0.4 | 0.8 | 14.05                             | 12.06 | 9.69  | 8.77  | 9.70  | 12.05 | 14.05 |
|                          | 102 | 0                              | 0.6 | 0   | 11.57                             | 11.42 | 11.14 | 10.99 | 11.13 | 11.43 | 11.57 |
|                          | 103 | 0                              | 0.6 | 0.2 | 12.26                             | 11.84 | 11.10 | 10.76 | 11.10 | 11.84 | 12.26 |
|                          | 104 | 0                              | 0.6 | 0.4 | 12.90                             | 12.02 | 10.67 | 10.10 | 10.67 | 12.02 | 12.90 |
|                          | 105 | 0                              | 0.6 | 0.6 | 13.47                             | 11.95 | 9.94  | 9.13  | 9.94  | 11.95 | 13.47 |
|                          | 106 | 0                              | 0.8 | 0   | 10.32                             | 10.11 | 9.70  | 9.50  | 9.70  | 10.10 | 10.31 |
|                          | 107 | 0                              | 0.8 | 0.2 | 11.05                             | 10.57 | 9.71  | 9.31  | 9.71  | 10.57 | 11.05 |
|                          | 108 | 0                              | 0.8 | 0.4 | 11.76                             | 10.87 | 9.41  | 8.77  | 9.41  | 10.87 | 11.76 |
|                          | 109 | 0.2                            | 0   | 0   | 13.57                             | 13.70 | 13.98 | 14.05 | 13.98 | 13.70 | 13.57 |
|                          | 110 | 0.2                            | 0   | 0.2 | 13.45                             | 13.87 | 13.94 | 13.57 | 13.20 | 13.15 | 13.45 |
|                          | 111 | 0.2                            | 0   | 0.4 | 13.12                             | 13.57 | 13.12 | 12.39 | 12.07 | 12.39 | 13.12 |
|                          | 112 | 0.2                            | 0   | 0.6 | 12.64                             | 12.95 | 11.98 | 10.99 | 10.80 | 11.53 | 12.65 |
|                          | 113 | 0.2                            | 0   | 0.8 | 12.07                             | 12.15 | 10.70 | 9.50  | 9.46  | 10.59 | 12.07 |
|                          | 114 | 0.2                            | 0.2 | 0   | 13.23                             | 13.51 | 13.70 | 13.57 | 13.28 | 13.12 | 13.22 |
|                          | 115 | 0.2                            | 0.2 | 0.2 | 13.51                             | 14.02 | 13.78 | 13.12 | 12.74 | 12.91 | 13.51 |
|                          | 116 | 0.2                            | 0.2 | 0.4 | 13.56                             | 14.05 | 13.09 | 12.07 | 11.80 | 12.40 | 13.56 |
|                          | 117 | 0.2                            | 0.2 | 0.6 | 13.38                             | 13.64 | 12.02 | 10.76 | 10.64 | 11.71 | 13.38 |
|                          | 118 | 0.2                            | 0.2 | 0.8 | 13.00                             | 12.91 | 10.79 | 9.31  | 9.36  | 10.91 | 13.00 |
|                          | 119 | 0.2                            | 0.4 | 0   | 12.39                             | 12.68 | 12.69 | 12.38 | 12.11 | 12.12 | 12.39 |
|                          | 120 | 0.2                            | 0.4 | 0.2 | 12.91                             | 13.33 | 12.82 | 12.07 | 11.78 | 12.15 | 12.91 |
|                          | 121 | 0.2                            | 0.4 | 0.4 | 13.32                             | 13.68 | 12.38 | 11.24 | 11.06 | 11.92 | 13.32 |
|                          | 122 | 0.2                            | 0.4 | 0.6 | 13.54                             | 13.61 | 11.53 | 10.10 | 10.08 | 11.47 | 13.54 |
|                          | 123 | 0.2                            | 0.4 | 0.8 | 13.53                             | 13.15 | 10.44 | 8.77  | 8.93  | 10.84 | 13.53 |

**Supplementary Table 1 Continued**

| Craniocaudal Plane Angle | No. | Position of Electrode-Tip (cm) |     |     | Orbital Plane Angle               |       |       |       |       |       |       |
|--------------------------|-----|--------------------------------|-----|-----|-----------------------------------|-------|-------|-------|-------|-------|-------|
|                          |     | Y                              | Z   | X   | 90°                               | 60°   | 30°   | 0°    | -30°  | -60°  | -90°  |
|                          |     |                                |     |     | Ablated Volume (cm <sup>3</sup> ) |       |       |       |       |       |       |
| - 30°                    | 124 | 0.2                            | 0.6 | 0   | 11.31                             | 11.57 | 11.40 | 10.99 | 10.77 | 10.91 | 11.31 |
|                          | 125 | 0.2                            | 0.6 | 0.2 | 11.95                             | 12.23 | 11.56 | 10.76 | 10.56 | 11.09 | 11.95 |
|                          | 126 | 0.2                            | 0.6 | 0.4 | 12.54                             | 12.69 | 11.28 | 10.10 | 10.02 | 11.07 | 12.54 |
|                          | 127 | 0.2                            | 0.6 | 0.6 | 13.03                             | 12.88 | 10.64 | 9.13  | 9.20  | 8.53  | 13.04 |
|                          | 128 | 0.2                            | 0.8 | 0   | 10.10                             | 10.31 | 10.00 | 9.50  | 9.32  | 9.61  | 10.10 |
|                          | 129 | 0.2                            | 0.8 | 0.2 | 10.81                             | 10.97 | 10.16 | 9.31  | 9.19  | 9.89  | 10.81 |
|                          | 130 | 0.2                            | 0.8 | 0.4 | 11.62                             | 11.49 | 10.00 | 8.77  | 8.77  | 10.00 | 11.49 |
|                          | 131 | 0.4                            | 0   | 0   | 12.38                             | 12.73 | 13.57 | 14.05 | 13.57 | 12.73 | 12.63 |
|                          | 132 | 0.4                            | 0   | 0.2 | 12.30                             | 13.14 | 13.94 | 13.57 | 12.62 | 12.09 | 12.55 |
|                          | 133 | 0.4                            | 0   | 0.4 | 12.07                             | 13.23 | 13.45 | 12.39 | 11.44 | 11.31 | 12.30 |
|                          | 134 | 0.4                            | 0   | 0.6 | 11.71                             | 12.95 | 12.45 | 10.99 | 10.14 | 10.44 | 11.91 |
|                          | 135 | 0.4                            | 0   | 0.8 | 11.24                             | 12.39 | 11.25 | 9.50  | 8.77  | 9.51  | 11.42 |
|                          | 136 | 0.4                            | 0.2 | 0   | 12.15                             | 12.75 | 13.54 | 13.57 | 12.81 | 12.17 | 12.38 |
|                          | 137 | 0.4                            | 0.2 | 0.2 | 12.34                             | 13.46 | 14.02 | 13.12 | 12.11 | 11.79 | 12.59 |
|                          | 138 | 0.4                            | 0.2 | 0.4 | 12.38                             | 13.89 | 13.63 | 12.07 | 11.09 | 11.21 | 12.63 |
|                          | 139 | 0.4                            | 0.2 | 0.6 | 12.25                             | 13.87 | 12.65 | 10.76 | 9.90  | 10.50 | 12.49 |
|                          | 140 | 0.4                            | 0.2 | 0.8 | 11.98                             | 13.40 | 11.45 | 9.31  | 8.61  | 9.69  | 12.20 |
|                          | 141 | 0.4                            | 0.4 | 0   | 11.50                             | 12.22 | 12.73 | 12.39 | 11.64 | 11.25 | 11.70 |
|                          | 142 | 0.4                            | 0.4 | 0.2 | 11.91                             | 13.06 | 13.16 | 12.07 | 11.16 | 11.09 | 12.13 |
|                          | 143 | 0.4                            | 0.4 | 0.4 | 12.21                             | 13.74 | 12.96 | 11.24 | 10.34 | 10.73 | 12.45 |
|                          | 144 | 0.4                            | 0.4 | 0.6 | 12.37                             | 14.05 | 12.22 | 10.10 | 9.32  | 10.20 | 12.62 |
|                          | 145 | 0.4                            | 0.6 | 0   | 10.59                             | 11.32 | 11.55 | 10.99 | 10.31 | 10.13 | 10.75 |
|                          | 146 | 0.4                            | 0.6 | 0.2 | 11.15                             | 12.17 | 11.92 | 10.76 | 9.96  | 10.13 | 11.32 |
|                          | 147 | 0.4                            | 0.6 | 0.4 | 11.62                             | 12.90 | 11.84 | 10.10 | 9.32  | 9.94  | 11.82 |
|                          | 148 | 0.4                            | 0.8 | 0   | 9.50                              | 10.20 | 10.20 | 9.50  | 8.87  | 8.87  | 9.64  |
|                          | 149 | 0.4                            | 0.8 | 0.2 | 10.15                             | 11.03 | 10.54 | 9.31  | 8.61  | 8.98  | 10.30 |
|                          | 150 | 0.6                            | 0   | 0   | 10.99                             | 11.57 | 13.02 | 14.05 | 13.02 | 11.57 | 10.99 |
|                          | 151 | 0.6                            | 0   | 0.2 | 10.93                             | 12.09 | 13.67 | 13.57 | 11.98 | 10.89 | 10.93 |
|                          | 152 | 0.6                            | 0   | 0.4 | 10.76                             | 12.39 | 13.57 | 12.38 | 10.76 | 10.10 | 10.76 |
|                          | 153 | 0.6                            | 0   | 0.6 | 10.48                             | 12.41 | 12.80 | 10.99 | 9.44  | 9.23  | 10.48 |
|                          | 154 | 0.6                            | 0.2 | 0   | 10.81                             | 11.71 | 13.17 | 13.57 | 12.23 | 11.03 | 10.82 |
|                          | 155 | 0.6                            | 0.2 | 0.2 | 10.96                             | 12.45 | 13.98 | 13.12 | 11.42 | 10.56 | 10.96 |
|                          | 156 | 0.6                            | 0.2 | 0.4 | 10.99                             | 13.03 | 14.00 | 12.07 | 10.36 | 9.94  | 10.99 |
|                          | 157 | 0.6                            | 0.2 | 0.6 | 10.90                             | 13.34 | 13.20 | 10.72 | 9.15  | 9.20  | 10.90 |
|                          | 158 | 0.6                            | 0.4 | 0   | 10.31                             | 11.40 | 12.59 | 12.38 | 11.09 | 10.19 | 10.31 |
|                          | 159 | 0.6                            | 0.4 | 0.2 | 10.64                             | 12.30 | 13.32 | 12.07 | 10.49 | 9.90  | 10.64 |
|                          | 160 | 0.6                            | 0.4 | 0.4 | 10.86                             | 13.10 | 13.43 | 11.24 | 9.61  | 9.45  | 10.87 |
|                          | 161 | 0.6                            | 0.4 | 0.6 | 10.98                             | 13.73 | 12.86 | 10.10 | 8.54  | 8.88  | 10.98 |
|                          | 162 | 0.6                            | 0.6 | 0   | 9.55                              | 10.72 | 11.56 | 10.99 | 9.78  | 9.14  | 9.55  |
|                          | 163 | 0.6                            | 0.6 | 0.2 | 10.02                             | 11.67 | 12.17 | 10.76 | 9.31  | 9.00  | 10.02 |
|                          | 164 | 0.6                            | 0.6 | 0.4 | 10.41                             | 12.55 | 12.31 | 10.10 | 8.59  | 8.72  | 10.41 |
|                          | 165 | 0.8                            | 0   | 0   | 9.50                              | 10.32 | 12.39 | 14.05 | 12.39 | 10.32 | 9.50  |

**Supplementary Table 1 Continued**

| Craniocaudal Plane Angle | No. | Position of Electrode-Tip (cm) |     |     | Orbital Plane Angle               |       |       |       |       |       |       |
|--------------------------|-----|--------------------------------|-----|-----|-----------------------------------|-------|-------|-------|-------|-------|-------|
|                          |     | Y                              | Z   | X   | 90°                               | 60°   | 30°   | 0°    | -30°  | -60°  | -90°  |
|                          |     |                                |     |     | Ablated Volume (cm <sup>3</sup> ) |       |       |       |       |       |       |
| - 30°                    | 166 | 0.8                            | 0   | 0.2 | 9.45                              | 10.89 | 13.20 | 13.57 | 11.29 | 9.61  | 9.45  |
|                          | 167 | 0.8                            | 0   | 0.4 | 9.31                              | 11.31 | 13.45 | 12.39 | 10.05 | 8.82  | 9.31  |
|                          | 168 | 0.8                            | 0.2 | 0   | 9.36                              | 10.52 | 12.66 | 13.57 | 11.60 | 9.79  | 9.36  |
|                          | 169 | 0.8                            | 0.2 | 0.2 | 9.47                              | 11.28 | 13.67 | 13.12 | 10.70 | 9.25  | 9.47  |
|                          | 170 | 0.8                            | 0.2 | 0.4 | 9.50                              | 11.91 | 14.05 | 12.07 | 9.60  | 8.60  | 9.50  |
|                          | 171 | 0.8                            | 0.4 | 0   | 8.95                              | 10.36 | 12.29 | 12.39 | 10.49 | 9.00  | 8.95  |
|                          | 172 | 0.8                            | 0.4 | 0.2 | 9.21                              | 11.26 | 13.26 | 12.07 | 9.78  | 8.63  | 9.22  |
| - 60°                    | 173 | 0                              | 0   | 0   | 14.05                             | 14.05 | 14.05 | 14.05 | 14.05 | 14.05 | 14.05 |
|                          | 174 | 0                              | 0   | 0.2 | 13.98                             | 13.87 | 13.67 | 13.57 | 13.67 | 13.87 | 13.97 |
|                          | 175 | 0                              | 0   | 0.4 | 13.57                             | 13.23 | 12.64 | 12.38 | 12.65 | 13.23 | 13.57 |
|                          | 176 | 0                              | 0   | 0.6 | 13.02                             | 12.41 | 11.42 | 10.99 | 11.42 | 12.41 | 13.02 |
|                          | 177 | 0                              | 0   | 0.8 | 12.39                             | 11.50 | 10.11 | 9.50  | 10.10 | 11.51 | 12.39 |
|                          | 178 | 0                              | 0.2 | 0   | 13.70                             | 13.67 | 13.60 | 13.57 | 13.60 | 13.67 | 13.70 |
|                          | 179 | 0                              | 0.2 | 0.2 | 13.17                             | 13.16 | 13.13 | 13.12 | 13.14 | 13.16 | 13.18 |
|                          | 180 | 0                              | 0.2 | 0.4 | 12.56                             | 12.44 | 12.19 | 12.07 | 12.19 | 12.44 | 12.57 |
|                          | 181 | 0                              | 0.2 | 0.6 | 11.90                             | 11.59 | 11.02 | 10.76 | 11.02 | 11.58 | 11.89 |
|                          | 182 | 0                              | 0.2 | 0.8 | 11.19                             | 10.67 | 9.74  | 9.31  | 9.74  | 10.67 | 11.19 |
|                          | 183 | 0                              | 0.4 | 0   | 12.73                             | 12.65 | 12.47 | 12.38 | 12.47 | 12.64 | 12.73 |
|                          | 184 | 0                              | 0.4 | 0.2 | 12.08                             | 12.08 | 12.07 | 12.07 | 12.07 | 12.08 | 12.08 |
|                          | 185 | 0                              | 0.4 | 0.4 | 11.39                             | 11.35 | 11.28 | 11.24 | 11.28 | 11.35 | 11.38 |
|                          | 186 | 0                              | 0.4 | 0.6 | 10.66                             | 10.51 | 10.24 | 10.10 | 10.24 | 10.52 | 10.66 |
|                          | 187 | 0                              | 0.4 | 0.8 | 9.91                              | 9.61  | 9.05  | 8.77  | 9.05  | 9.61  | 9.92  |
|                          | 188 | 0                              | 0.6 | 0   | 11.57                             | 11.43 | 11.13 | 10.99 | 11.14 | 11.42 | 11.57 |
|                          | 189 | 0                              | 0.6 | 0.2 | 10.86                             | 10.84 | 10.79 | 10.76 | 10.79 | 10.83 | 10.86 |
|                          | 190 | 0                              | 0.6 | 0.4 | 10.11                             | 10.12 | 10.11 | 10.10 | 10.11 | 10.11 | 10.11 |
|                          | 191 | 0                              | 0.6 | 0.6 | 9.36                              | 9.30  | 9.19  | 9.13  | 9.19  | 9.30  | 9.36  |
|                          | 192 | 0                              | 0.8 | 0   | 10.31                             | 10.10 | 9.70  | 9.50  | 9.70  | 10.11 | 10.32 |
|                          | 193 | 0                              | 0.8 | 0.2 | 9.56                              | 9.50  | 9.38  | 9.31  | 9.37  | 9.50  | 9.56  |
|                          | 194 | 0                              | 0.8 | 0.4 | 8.79                              | 8.78  | 8.78  | 8.77  | 8.78  | 8.78  | 8.79  |
|                          | 195 | 0.2                            | 0   | 0   | 13.57                             | 13.70 | 13.97 | 14.05 | 13.97 | 13.70 | 13.57 |
|                          | 196 | 0.2                            | 0   | 0.2 | 13.45                             | 13.87 | 13.94 | 13.57 | 13.20 | 13.15 | 13.45 |
|                          | 197 | 0.2                            | 0   | 0.4 | 13.12                             | 13.57 | 13.12 | 12.38 | 12.77 | 12.39 | 13.12 |
|                          | 198 | 0.2                            | 0   | 0.6 | 12.64                             | 12.95 | 11.98 | 10.99 | 10.80 | 11.53 | 12.65 |
|                          | 199 | 0.2                            | 0   | 0.8 | 12.07                             | 12.15 | 10.70 | 9.50  | 9.46  | 10.59 | 12.07 |
|                          | 200 | 0.2                            | 0.2 | 0   | 13.23                             | 13.12 | 13.28 | 13.57 | 13.70 | 13.51 | 13.23 |
|                          | 201 | 0.2                            | 0.2 | 0.2 | 12.78                             | 12.98 | 13.16 | 13.12 | 12.91 | 12.75 | 12.78 |
|                          | 202 | 0.2                            | 0.2 | 0.4 | 12.23                             | 13.27 | 12.46 | 12.07 | 11.80 | 11.87 | 12.24 |
|                          | 203 | 0.2                            | 0.2 | 0.6 | 11.61                             | 11.88 | 11.42 | 10.76 | 10.54 | 10.94 | 11.61 |
|                          | 204 | 0.2                            | 0.2 | 0.8 | 10.95                             | 11.10 | 10.21 | 9.31  | 9.20  | 9.96  | 10.95 |
|                          | 205 | 0.2                            | 0.4 | 0   | 12.39                             | 12.12 | 12.11 | 12.39 | 12.69 | 12.68 | 12.39 |
|                          | 206 | 0.2                            | 0.4 | 0.2 | 11.78                             | 11.82 | 11.97 | 12.07 | 12.04 | 11.89 | 11.78 |
|                          | 207 | 0.2                            | 0.4 | 0.4 | 11.13                             | 11.32 | 11.38 | 11.24 | 11.06 | 11.01 | 11.13 |

**Supplementary Table 1 Continued**

| Craniocaudal Plane Angle | No.        | Position of Electrode-Tip (cm) |            |            | Orbital Plane Angle               |       |       |       |       |       |       |
|--------------------------|------------|--------------------------------|------------|------------|-----------------------------------|-------|-------|-------|-------|-------|-------|
|                          |            | Y                              | Z          | X          | 90°                               | 60°   | 30°   | 0°    | -30°  | -60°  | -90°  |
|                          |            |                                |            |            | Ablated Volume (cm <sup>3</sup> ) |       |       |       |       |       |       |
| <b>- 60°</b>             | <b>208</b> | <b>0.2</b>                     | <b>0.4</b> | <b>0.6</b> | 10.44                             | 10.66 | 10.48 | 10.10 | 9.90  | 10.06 | 10.43 |
|                          | <b>209</b> | <b>0.2</b>                     | <b>0.4</b> | <b>0.8</b> | 9.71                              | 9.88  | 9.39  | 8.77  | 8.63  | 9.07  | 9.72  |
|                          | <b>210</b> | <b>0.2</b>                     | <b>0.6</b> | <b>0</b>   | 11.31                             | 10.91 | 10.77 | 10.99 | 11.40 | 11.57 | 11.31 |
|                          | <b>211</b> | <b>0.2</b>                     | <b>0.6</b> | <b>0.2</b> | 10.62                             | 10.54 | 10.60 | 10.76 | 10.85 | 10.78 | 10.63 |
|                          | <b>212</b> | <b>0.2</b>                     | <b>0.6</b> | <b>0.4</b> | 9.91                              | 10.00 | 10.10 | 10.10 | 10.01 | 9.92  | 9.91  |
|                          | <b>213</b> | <b>0.2</b>                     | <b>0.6</b> | <b>0.6</b> | 7.64                              | 9.34  | 9.32  | 9.13  | 8.97  | 8.99  | 9.17  |
|                          | <b>214</b> | <b>0.2</b>                     | <b>0.8</b> | <b>0</b>   | 10.10                             | 9.61  | 9.32  | 9.50  | 10.00 | 10.31 | 10.10 |
|                          | <b>215</b> | <b>0.2</b>                     | <b>0.8</b> | <b>0.2</b> | 9.37                              | 9.18  | 9.15  | 9.31  | 9.52  | 9.54  | 9.37  |
|                          | <b>216</b> | <b>0.2</b>                     | <b>0.8</b> | <b>0.4</b> | 8.61                              | 8.61  | 8.69  | 8.77  | 8.78  | 8.69  | 8.61  |
|                          | <b>217</b> | <b>0.4</b>                     | <b>0</b>   | <b>0</b>   | 12.39                             | 12.73 | 13.57 | 14.05 | 13.57 | 12.73 | 12.39 |
|                          | <b>218</b> | <b>0.4</b>                     | <b>0</b>   | <b>0.2</b> | 12.30                             | 13.15 | 13.94 | 13.57 | 12.62 | 12.09 | 12.30 |
|                          | <b>219</b> | <b>0.4</b>                     | <b>0</b>   | <b>0.4</b> | 12.07                             | 13.23 | 13.45 | 12.38 | 11.44 | 11.31 | 12.07 |
|                          | <b>220</b> | <b>0.4</b>                     | <b>0</b>   | <b>0.6</b> | 11.71                             | 12.94 | 12.45 | 10.99 | 10.14 | 10.44 | 11.71 |
|                          | <b>221</b> | <b>0.4</b>                     | <b>0</b>   | <b>0.8</b> | 11.24                             | 12.39 | 11.25 | 9.50  | 8.77  | 9.51  | 11.24 |
|                          | <b>222</b> | <b>0.4</b>                     | <b>0.2</b> | <b>0</b>   | 12.15                             | 12.17 | 12.81 | 13.57 | 13.54 | 12.75 | 12.14 |
|                          | <b>223</b> | <b>0.4</b>                     | <b>0.2</b> | <b>0.2</b> | 11.81                             | 12.30 | 12.99 | 13.12 | 12.52 | 11.92 | 11.82 |
|                          | <b>224</b> | <b>0.4</b>                     | <b>0.2</b> | <b>0.4</b> | 11.37                             | 12.15 | 12.56 | 12.07 | 11.31 | 11.00 | 11.38 |
|                          | <b>225</b> | <b>0.4</b>                     | <b>0.2</b> | <b>0.6</b> | 10.86                             | 11.77 | 11.71 | 10.76 | 9.99  | 10.04 | 10.86 |
|                          | <b>226</b> | <b>0.4</b>                     | <b>0.2</b> | <b>0.8</b> | 10.27                             | 11.17 | 10.61 | 9.31  | 8.61  | 9.03  | 10.27 |
|                          | <b>227</b> | <b>0.4</b>                     | <b>0.4</b> | <b>0</b>   | 11.50                             | 11.25 | 11.65 | 12.38 | 12.73 | 12.22 | 11.50 |
|                          | <b>228</b> | <b>0.4</b>                     | <b>0.4</b> | <b>0.2</b> | 11.00                             | 11.19 | 11.72 | 12.07 | 11.85 | 11.31 | 11.00 |
|                          | <b>229</b> | <b>0.4</b>                     | <b>0.4</b> | <b>0.4</b> | 10.43                             | 10.92 | 11.35 | 11.24 | 10.73 | 10.34 | 10.43 |
|                          | <b>230</b> | <b>0.4</b>                     | <b>0.4</b> | <b>0.6</b> | 9.81                              | 10.47 | 10.62 | 10.10 | 9.48  | 9.35  | 9.81  |
|                          | <b>231</b> | <b>0.4</b>                     | <b>0.6</b> | <b>0</b>   | 10.59                             | 10.13 | 10.31 | 10.99 | 11.55 | 11.32 | 10.59 |
|                          | <b>232</b> | <b>0.4</b>                     | <b>0.6</b> | <b>0.2</b> | 9.98                              | 9.94  | 10.32 | 10.76 | 10.81 | 10.40 | 9.98  |
|                          | <b>233</b> | <b>0.4</b>                     | <b>0.6</b> | <b>0.4</b> | 9.33                              | 9.60  | 9.99  | 10.10 | 9.83  | 9.44  | 9.33  |
|                          | <b>234</b> | <b>0.4</b>                     | <b>0.8</b> | <b>0</b>   | 9.51                              | 8.87  | 8.87  | 9.50  | 10.20 | 10.20 | 9.51  |
|                          | <b>235</b> | <b>0.4</b>                     | <b>0.8</b> | <b>0.2</b> | 8.82                              | 8.60  | 8.84  | 9.31  | 9.56  | 9.31  | 8.82  |
|                          | <b>236</b> | <b>0.6</b>                     | <b>0</b>   | <b>0</b>   | 10.99                             | 11.57 | 13.02 | 14.05 | 13.02 | 11.57 | 10.99 |
|                          | <b>237</b> | <b>0.6</b>                     | <b>0</b>   | <b>0.2</b> | 10.93                             | 12.09 | 13.71 | 13.57 | 11.98 | 10.90 | 10.93 |
|                          | <b>238</b> | <b>0.6</b>                     | <b>0</b>   | <b>0.4</b> | 10.76                             | 12.39 | 13.57 | 12.38 | 10.76 | 10.10 | 10.76 |
|                          | <b>239</b> | <b>0.6</b>                     | <b>0</b>   | <b>0.6</b> | 10.48                             | 12.41 | 12.81 | 10.99 | 9.44  | 9.23  | 10.48 |
|                          | <b>240</b> | <b>0.6</b>                     | <b>0.2</b> | <b>0</b>   | 10.82                             | 11.03 | 12.23 | 13.57 | 13.17 | 11.71 | 10.82 |
|                          | <b>241</b> | <b>0.6</b>                     | <b>0.2</b> | <b>0.2</b> | 10.56                             | 11.32 | 12.64 | 13.12 | 12.02 | 10.86 | 10.56 |
|                          | <b>242</b> | <b>0.6</b>                     | <b>0.2</b> | <b>0.4</b> | 10.21                             | 11.39 | 12.50 | 12.07 | 10.75 | 9.93  | 10.21 |
|                          | <b>243</b> | <b>0.6</b>                     | <b>0.2</b> | <b>0.6</b> | 9.78                              | 11.25 | 11.87 | 10.76 | 9.39  | 8.97  | 9.78  |
|                          | <b>244</b> | <b>0.6</b>                     | <b>0.4</b> | <b>0</b>   | 10.31                             | 10.19 | 11.09 | 12.38 | 12.59 | 11.40 | 10.31 |
|                          | <b>245</b> | <b>0.6</b>                     | <b>0.4</b> | <b>0.2</b> | 9.90                              | 10.30 | 11.35 | 12.07 | 11.53 | 10.45 | 9.90  |
|                          | <b>246</b> | <b>0.6</b>                     | <b>0.4</b> | <b>0.4</b> | 9.42                              | 10.22 | 11.19 | 11.24 | 10.32 | 9.47  | 9.41  |
|                          | <b>247</b> | <b>0.6</b>                     | <b>0.4</b> | <b>0.6</b> | 8.87                              | 9.96  | 10.65 | 10.10 | 9.00  | 8.43  | 8.87  |
|                          | <b>248</b> | <b>0.6</b>                     | <b>0.6</b> | <b>0</b>   | 9.55                              | 9.14  | 9.78  | 10.99 | 11.56 | 10.72 | 9.55  |
|                          | <b>249</b> | <b>0.6</b>                     | <b>0.6</b> | <b>0.2</b> | 9.02                              | 9.11  | 9.94  | 10.76 | 10.64 | 9.74  | 9.02  |

**Supplementary Table 1 Continued**

| Craniocaudal Plane Angle | No. | Position of Electrode-Tip (cm) |     |     | Orbital Plane Angle               |       |       |       |       |       |       |
|--------------------------|-----|--------------------------------|-----|-----|-----------------------------------|-------|-------|-------|-------|-------|-------|
|                          |     | Y                              | Z   | X   | 90°                               | 60°   | 30°   | 0°    | -30°  | -60°  | -90°  |
|                          |     |                                |     |     | Ablated Volume (cm <sup>3</sup> ) |       |       |       |       |       |       |
| - 60°                    | 250 | 0.6                            | 0.6 | 0.4 | 8.44                              | 8.93  | 9.77  | 10.10 | 9.54  | 8.72  | 8.44  |
|                          | 251 | 0.6                            | 0.8 | 0   | 9.50                              | 10.32 | 12.39 | 14.05 | 12.39 | 10.32 | 9.50  |
|                          | 252 | 0.6                            | 0.8 | 0.2 | 9.46                              | 10.89 | 13.20 | 13.57 | 11.30 | 9.61  | 9.45  |
|                          | 253 | 0.6                            | 0.8 | 0.4 | 9.31                              | 11.31 | 13.45 | 12.38 | 10.06 | 8.82  | 9.31  |
|                          | 254 | 0.8                            | 0   | 0   | 9.36                              | 9.79  | 11.60 | 13.57 | 12.66 | 10.52 | 9.36  |
|                          | 255 | 0.8                            | 0   | 0.2 | 9.15                              | 10.18 | 12.16 | 13.12 | 11.44 | 9.67  | 9.15  |
|                          | 256 | 0.8                            | 0   | 0.4 | 8.86                              | 10.40 | 12.28 | 12.07 | 10.12 | 8.75  | 8.86  |
|                          | 257 | 0.8                            | 0.2 | 0   | 8.94                              | 9.00  | 10.49 | 12.38 | 12.29 | 10.36 | 8.95  |
|                          | 258 | 0.8                            | 0.2 | 0.2 | 8.60                              | 9.23  | 10.89 | 12.07 | 11.11 | 9.41  | 8.60  |
| - 90°                    | 259 | 0                              | 0   | 0   | 14.05                             | 14.05 | 14.05 | 14.05 | 14.05 | 14.05 | 14.05 |
|                          | 260 | 0                              | 0   | 0.2 | 13.70                             | 13.67 | 13.60 | 13.57 | 13.60 | 13.67 | 13.70 |
|                          | 261 | 0                              | 0   | 0.4 | 12.73                             | 12.64 | 12.47 | 12.38 | 12.47 | 12.65 | 12.73 |
|                          | 262 | 0                              | 0   | 0.6 | 11.57                             | 11.42 | 11.14 | 10.99 | 11.13 | 11.42 | 11.57 |
|                          | 263 | 0                              | 0   | 0.8 | 10.32                             | 10.11 | 9.70  | 9.50  | 9.70  | 10.10 | 10.31 |
|                          | 264 | 0                              | 0.2 | 0   | 13.97                             | 13.87 | 13.67 | 13.57 | 13.67 | 13.87 | 13.97 |
|                          | 265 | 0                              | 0.2 | 0.2 | 14.03                             | 13.78 | 13.33 | 13.12 | 13.32 | 13.78 | 14.03 |
|                          | 266 | 0                              | 0.2 | 0.4 | 13.33                             | 12.97 | 12.34 | 12.07 | 12.34 | 12.96 | 13.33 |
|                          | 267 | 0                              | 0.2 | 0.6 | 12.26                             | 11.84 | 11.10 | 10.76 | 11.10 | 11.84 | 12.26 |
|                          | 268 | 0                              | 0.2 | 0.8 | 11.05                             | 10.57 | 9.71  | 9.31  | 9.71  | 10.57 | 11.05 |
|                          | 269 | 0                              | 0.4 | 0   | 13.57                             | 13.23 | 12.64 | 12.38 | 11.76 | 13.23 | 13.57 |
|                          | 270 | 0                              | 0.4 | 0.2 | 14.05                             | 13.45 | 12.47 | 12.07 | 12.47 | 13.45 | 14.05 |
|                          | 271 | 0                              | 0.4 | 0.4 | 13.81                             | 12.96 | 11.75 | 11.24 | 11.74 | 12.96 | 13.81 |
|                          | 272 | 0                              | 0.4 | 0.6 | 12.90                             | 12.02 | 10.67 | 10.10 | 10.68 | 12.02 | 12.90 |
|                          | 273 | 0                              | 0.4 | 0.8 | 11.76                             | 10.87 | 9.41  | 8.77  | 9.41  | 10.87 | 11.76 |
|                          | 274 | 0                              | 0.6 | 0   | 13.02                             | 12.41 | 11.42 | 10.99 | 11.42 | 12.41 | 13.02 |
|                          | 275 | 0                              | 0.6 | 0.2 | 13.89                             | 12.81 | 11.35 | 10.76 | 11.35 | 12.80 | 13.89 |
|                          | 276 | 0                              | 0.6 | 0.4 | 14.05                             | 12.63 | 10.82 | 10.10 | 10.82 | 12.63 | 14.05 |
|                          | 277 | 0                              | 0.6 | 0.6 | 13.47                             | 11.95 | 9.94  | 9.13  | 9.94  | 11.95 | 13.47 |
|                          | 278 | 0                              | 0.8 | 0   | 12.38                             | 11.50 | 10.10 | 9.50  | 10.10 | 11.51 | 12.39 |
|                          | 279 | 0                              | 0.8 | 0.2 | 13.44                             | 12.01 | 10.09 | 9.31  | 10.09 | 12.01 | 13.43 |
|                          | 280 | 0                              | 0.8 | 0.4 | 14.05                             | 12.04 | 9.70  | 8.77  | 9.69  | 12.05 | 14.05 |
|                          | 281 | 0.2                            | 0   | 0   | 13.57                             | 13.70 | 13.98 | 14.05 | 13.97 | 13.70 | 13.57 |
|                          | 282 | 0.2                            | 0   | 0.2 | 13.23                             | 13.51 | 13.70 | 13.57 | 13.28 | 13.12 | 13.23 |
|                          | 283 | 0.2                            | 0   | 0.4 | 12.39                             | 12.68 | 12.69 | 12.38 | 12.12 | 12.12 | 12.39 |
|                          | 284 | 0.2                            | 0   | 0.6 | 11.31                             | 11.57 | 11.40 | 10.99 | 10.77 | 10.91 | 11.31 |
|                          | 285 | 0.2                            | 0   | 0.8 | 10.10                             | 10.31 | 10.00 | 9.50  | 9.32  | 9.61  | 10.11 |
|                          | 286 | 0.2                            | 0.2 | 0   | 13.45                             | 13.87 | 13.94 | 13.57 | 13.20 | 13.15 | 13.45 |
|                          | 287 | 0.2                            | 0.2 | 0.2 | 13.50                             | 14.02 | 13.78 | 13.12 | 12.74 | 12.91 | 13.50 |
|                          | 288 | 0.2                            | 0.2 | 0.4 | 12.91                             | 13.33 | 12.82 | 12.07 | 11.78 | 12.15 | 12.91 |
|                          | 289 | 0.2                            | 0.2 | 0.6 | 11.95                             | 12.23 | 11.56 | 10.76 | 10.56 | 11.10 | 11.95 |
|                          | 290 | 0.2                            | 0.2 | 0.8 | 10.81                             | 10.97 | 10.17 | 9.31  | 9.19  | 9.88  | 10.81 |
|                          | 291 | 0.2                            | 0.4 | 0   | 13.12                             | 13.57 | 13.12 | 12.38 | 12.07 | 12.39 | 13.12 |

**Supplementary Table 1 Continued**

| Craniocaudal Plane Angle | No. | Position of Electrode-Tip (cm) |     |     | Orbital Plane Angle               |       |       |       |       |       |       |
|--------------------------|-----|--------------------------------|-----|-----|-----------------------------------|-------|-------|-------|-------|-------|-------|
|                          |     | Y                              | Z   | X   | 90°                               | 60°   | 30°   | 0°    | -30°  | -60°  | -90°  |
|                          |     |                                |     |     | Ablated Volume (cm <sup>3</sup> ) |       |       |       |       |       |       |
| - 90°                    | 292 | 0.2                            | 0.4 | 0.2 | 13.56                             | 14.05 | 13.09 | 12.07 | 11.80 | 12.40 | 13.56 |
|                          | 293 | 0.2                            | 0.4 | 0.4 | 13.32                             | 13.68 | 12.38 | 11.24 | 11.06 | 11.92 | 13.32 |
|                          | 294 | 0.2                            | 0.4 | 0.6 | 12.53                             | 12.69 | 11.28 | 10.10 | 10.02 | 11.07 | 12.54 |
|                          | 295 | 0.2                            | 0.4 | 0.8 | 11.48                             | 11.49 | 10.00 | 8.77  | 8.77  | 10.00 | 11.48 |
|                          | 296 | 0.2                            | 0.6 | 0   | 12.65                             | 12.95 | 11.98 | 10.99 | 10.80 | 11.53 | 12.65 |
|                          | 297 | 0.2                            | 0.6 | 0.2 | 13.38                             | 13.64 | 12.02 | 10.76 | 10.64 | 11.71 | 13.38 |
|                          | 298 | 0.2                            | 0.6 | 0.4 | 13.54                             | 13.61 | 11.53 | 10.10 | 10.08 | 11.47 | 13.54 |
|                          | 299 | 0.2                            | 0.6 | 0.6 | 13.03                             | 12.88 | 10.64 | 9.13  | 9.20  | 10.83 | 13.04 |
|                          | 300 | 0.2                            | 0.8 | 0   | 12.07                             | 12.15 | 10.70 | 9.50  | 9.46  | 10.59 | 12.07 |
|                          | 301 | 0.2                            | 0.8 | 0.2 | 13.00                             | 12.91 | 10.78 | 9.31  | 9.36  | 10.91 | 13.01 |
|                          | 302 | 0.2                            | 0.8 | 0.4 | 13.53                             | 13.15 | 10.44 | 8.77  | 8.93  | 10.84 | 13.53 |
|                          | 303 | 0.4                            | 0   | 0   | 12.39                             | 12.73 | 13.57 | 14.05 | 13.57 | 12.73 | 12.39 |
|                          | 304 | 0.4                            | 0   | 0.2 | 12.15                             | 12.75 | 13.54 | 13.57 | 12.81 | 12.17 | 12.14 |
|                          | 305 | 0.4                            | 0   | 0.4 | 11.50                             | 12.22 | 12.73 | 12.38 | 11.65 | 11.25 | 11.51 |
|                          | 306 | 0.4                            | 0   | 0.6 | 10.59                             | 11.32 | 11.55 | 10.99 | 10.31 | 10.13 | 10.59 |
|                          | 307 | 0.4                            | 0   | 0.8 | 9.50                              | 10.20 | 10.20 | 9.50  | 8.87  | 8.87  | 9.51  |
|                          | 308 | 0.4                            | 0.2 | 0   | 12.30                             | 13.14 | 13.94 | 13.57 | 12.62 | 12.09 | 12.30 |
|                          | 309 | 0.4                            | 0.2 | 0.2 | 12.34                             | 13.46 | 14.02 | 13.12 | 12.11 | 11.79 | 12.34 |
|                          | 310 | 0.4                            | 0.2 | 0.4 | 11.92                             | 13.06 | 13.16 | 12.07 | 11.16 | 11.09 | 11.92 |
|                          | 311 | 0.4                            | 0.2 | 0.6 | 11.14                             | 12.16 | 11.92 | 10.76 | 9.96  | 10.13 | 11.14 |
|                          | 312 | 0.4                            | 0.2 | 0.8 | 10.14                             | 11.03 | 10.54 | 9.31  | 8.61  | 8.98  | 10.15 |
|                          | 313 | 0.4                            | 0.4 | 0   | 12.07                             | 13.23 | 13.45 | 12.38 | 11.44 | 11.31 | 12.07 |
|                          | 314 | 0.4                            | 0.4 | 0.2 | 12.38                             | 13.89 | 13.62 | 12.07 | 11.09 | 11.21 | 12.38 |
|                          | 315 | 0.4                            | 0.4 | 0.4 | 12.21                             | 13.74 | 12.96 | 11.24 | 10.35 | 10.73 | 12.21 |
|                          | 316 | 0.4                            | 0.4 | 0.6 | 11.63                             | 12.90 | 11.84 | 10.10 | 9.32  | 9.94  | 11.63 |
|                          | 317 | 0.4                            | 0.6 | 0   | 11.71                             | 12.94 | 12.45 | 10.99 | 10.02 | 10.44 | 11.71 |
|                          | 318 | 0.4                            | 0.6 | 0.2 | 12.25                             | 13.87 | 12.65 | 10.76 | 9.90  | 10.50 | 12.25 |
|                          | 319 | 0.4                            | 0.6 | 0.4 | 12.37                             | 14.05 | 12.22 | 10.10 | 9.32  | 10.20 | 12.37 |
|                          | 320 | 0.4                            | 0.8 | 0   | 11.24                             | 12.39 | 11.25 | 9.50  | 8.77  | 9.51  | 11.24 |
|                          | 321 | 0.4                            | 0.8 | 0.2 | 11.98                             | 13.40 | 11.45 | 9.31  | 8.61  | 9.68  | 11.98 |
|                          | 322 | 0.6                            | 0   | 0   | 10.99                             | 11.57 | 13.02 | 14.05 | 13.02 | 11.57 | 10.99 |
|                          | 323 | 0.6                            | 0   | 0.2 | 10.81                             | 11.71 | 13.17 | 13.57 | 12.23 | 11.03 | 10.82 |
|                          | 324 | 0.6                            | 0   | 0.4 | 10.31                             | 11.40 | 12.59 | 12.38 | 11.10 | 10.19 | 10.31 |
|                          | 325 | 0.6                            | 0   | 0.6 | 9.55                              | 10.72 | 11.56 | 10.99 | 9.78  | 9.64  | 9.55  |
|                          | 326 | 0.6                            | 0.2 | 0   | 10.93                             | 12.09 | 13.67 | 13.57 | 11.97 | 10.90 | 10.93 |
|                          | 327 | 0.6                            | 0.2 | 0.2 | 10.96                             | 12.45 | 13.98 | 13.12 | 11.42 | 10.56 | 10.96 |
|                          | 328 | 0.6                            | 0.2 | 0.4 | 10.64                             | 12.30 | 13.32 | 12.07 | 10.49 | 9.90  | 10.64 |
|                          | 329 | 0.6                            | 0.2 | 0.6 | 10.02                             | 11.67 | 12.17 | 10.76 | 9.32  | 9.00  | 10.02 |
|                          | 330 | 0.6                            | 0.4 | 0   | 10.76                             | 12.39 | 13.57 | 12.38 | 10.76 | 10.10 | 10.76 |
|                          | 331 | 0.6                            | 0.4 | 0.2 | 10.99                             | 13.03 | 14.00 | 12.07 | 10.96 | 9.94  | 10.99 |
|                          | 332 | 0.6                            | 0.4 | 0.4 | 10.87                             | 13.10 | 13.43 | 11.24 | 9.61  | 9.45  | 10.87 |
|                          | 333 | 0.6                            | 0.4 | 0.6 | 10.41                             | 12.55 | 12.31 | 10.10 | 8.59  | 8.72  | 10.41 |



**Supplementary Table 1 Continued**

| Craniocaudal Plane Angle | No. | Position of Electrode-Tip (cm) |     |     | Orbital Plane Angle               |       |       |       |       |       |       |
|--------------------------|-----|--------------------------------|-----|-----|-----------------------------------|-------|-------|-------|-------|-------|-------|
|                          |     | Y                              | Z   | X   | 90°                               | 60°   | 30°   | 0°    | -30°  | -60°  | -90°  |
|                          |     |                                |     |     | Ablated Volume (cm <sup>3</sup> ) |       |       |       |       |       |       |
| - 90°                    | 334 | 0.6                            | 0.6 | 0   | 10.48                             | 12.41 | 12.81 | 10.99 | 9.44  | 9.23  | 10.48 |
|                          | 335 | 0.6                            | 0.6 | 0.2 | 10.90                             | 13.34 | 13.20 | 10.76 | 9.15  | 9.20  | 10.90 |
|                          | 336 | 0.6                            | 0.6 | 0.4 | 10.98                             | 13.73 | 12.86 | 10.10 | 8.54  | 8.88  | 10.98 |
|                          | 337 | 0.8                            | 0   | 0   | 9.50                              | 10.32 | 12.45 | 14.05 | 12.39 | 10.32 | 9.45  |
|                          | 338 | 0.8                            | 0   | 0.2 | 9.36                              | 10.52 | 12.34 | 13.57 | 11.60 | 9.79  | 9.36  |
|                          | 339 | 0.8                            | 0   | 0.4 | 8.95                              | 10.36 | 12.29 | 12.38 | 11.29 | 9.00  | 8.95  |
|                          | 340 | 0.8                            | 0.2 | 0   | 9.46                              | 10.89 | 13.20 | 13.57 | 10.70 | 9.61  | 9.45  |
|                          | 341 | 0.8                            | 0.2 | 0.2 | 9.48                              | 11.28 | 13.67 | 13.12 | 13.62 | 9.25  | 9.47  |
|                          | 342 | 0.8                            | 0.2 | 0.4 | 9.21                              | 11.26 | 13.26 | 12.07 | 10.05 | 8.63  | 9.22  |
|                          | 343 | 0.8                            | 0.4 | 0   | 9.31                              | 11.31 | 13.45 | 12.38 | 9.60  | 8.82  | 9.31  |
|                          | 344 | 0.8                            | 0.4 | 0.2 | 9.50                              | 11.91 | 14.05 | 12.07 | 10.69 | 8.60  | 9.50  |
| 30°                      | 345 | 0                              | 0   | 0   | 14.05                             | 14.05 | 14.05 | 14.05 | 14.05 | 14.05 | 14.05 |
|                          | 346 | 0                              | 0   | 0.2 | 13.70                             | 13.67 | 13.60 | 13.57 | 13.60 | 13.67 | 13.70 |
|                          | 347 | 0                              | 0   | 0.4 | 12.73                             | 12.64 | 12.47 | 12.39 | 12.47 | 12.65 | 12.73 |
|                          | 348 | 0                              | 0   | 0.6 | 11.57                             | 11.42 | 11.14 | 10.99 | 11.13 | 11.43 | 11.57 |
|                          | 349 | 0                              | 0   | 0.8 | 10.32                             | 10.11 | 9.70  | 9.50  | 9.70  | 10.10 | 10.31 |
|                          | 350 | 0                              | 0.2 | 0   | 13.97                             | 13.87 | 13.67 | 13.57 | 13.67 | 13.87 | 13.97 |
|                          | 351 | 0                              | 0.2 | 0.2 | 13.18                             | 13.16 | 13.14 | 13.12 | 13.14 | 13.16 | 13.17 |
|                          | 352 | 0                              | 0.2 | 0.4 | 10.07                             | 12.07 | 12.08 | 12.07 | 12.07 | 12.08 | 12.08 |
|                          | 353 | 0                              | 0.2 | 0.6 | 10.85                             | 10.83 | 10.79 | 10.76 | 10.79 | 10.84 | 10.86 |
|                          | 354 | 0                              | 0.2 | 0.8 | 9.56                              | 9.50  | 9.38  | 9.31  | 9.38  | 9.50  | 9.56  |
|                          | 355 | 0                              | 0.4 | 0   | 13.57                             | 13.23 | 12.65 | 12.39 | 12.64 | 13.00 | 13.57 |
|                          | 356 | 0                              | 0.4 | 0.2 | 12.57                             | 12.43 | 12.19 | 12.07 | 12.19 | 12.43 | 12.56 |
|                          | 357 | 0                              | 0.4 | 0.4 | 11.38                             | 11.35 | 11.28 | 11.24 | 11.28 | 11.35 | 11.38 |
|                          | 358 | 0                              | 0.4 | 0.6 | 10.11                             | 10.11 | 10.11 | 10.10 | 10.11 | 10.12 | 10.11 |
|                          | 359 | 0                              | 0.4 | 0.8 | 8.79                              | 8.78  | 8.77  | 8.77  | 8.78  | 8.78  | 8.79  |
|                          | 360 | 0                              | 0.6 | 0   | 13.02                             | 12.41 | 11.42 | 10.99 | 11.42 | 12.41 | 13.02 |
|                          | 361 | 0                              | 0.6 | 0.2 | 11.89                             | 11.58 | 11.02 | 10.76 | 11.02 | 11.59 | 11.90 |
|                          | 362 | 0                              | 0.6 | 0.4 | 10.65                             | 10.51 | 10.24 | 10.10 | 10.24 | 10.69 | 10.66 |
|                          | 363 | 0                              | 0.6 | 0.6 | 9.36                              | 9.30  | 9.19  | 9.13  | 9.19  | 9.30  | 9.36  |
|                          | 364 | 0                              | 0.8 | 0   | 12.39                             | 11.51 | 10.10 | 9.50  | 10.11 | 11.51 | 12.39 |
|                          | 365 | 0                              | 0.8 | 0.2 | 11.19                             | 10.67 | 9.74  | 9.31  | 9.74  | 10.67 | 11.19 |
|                          | 366 | 0                              | 0.8 | 0.4 | 9.91                              | 9.61  | 9.04  | 8.77  | 9.04  | 9.61  | 9.92  |
|                          | 367 | 0.2                            | 0   | 0   | 13.57                             | 13.70 | 13.97 | 14.05 | 13.98 | 13.70 | 13.57 |
|                          | 368 | 0.2                            | 0   | 0.2 | 13.22                             | 13.51 | 13.70 | 13.57 | 13.28 | 13.12 | 13.22 |
|                          | 369 | 0.2                            | 0   | 0.4 | 12.39                             | 12.68 | 12.68 | 12.39 | 12.11 | 12.11 | 12.39 |
|                          | 370 | 0.2                            | 0   | 0.6 | 11.31                             | 11.57 | 11.40 | 11.00 | 10.77 | 10.91 | 11.31 |
|                          | 371 | 0.2                            | 0   | 0.8 | 10.10                             | 10.31 | 10.00 | 9.50  | 9.32  | 9.61  | 10.10 |
|                          | 372 | 0.2                            | 0.2 | 0   | 13.45                             | 13.15 | 13.20 | 13.57 | 13.94 | 13.87 | 13.45 |
|                          | 373 | 0.2                            | 0.2 | 0.2 | 12.78                             | 12.75 | 12.91 | 13.12 | 13.16 | 12.98 | 12.78 |
|                          | 374 | 0.2                            | 0.2 | 0.4 | 11.78                             | 11.89 | 12.04 | 12.07 | 11.97 | 11.82 | 11.78 |
|                          | 375 | 0.2                            | 0.2 | 0.6 | 10.62                             | 10.78 | 10.85 | 10.76 | 10.60 | 10.54 | 10.64 |

**Supplementary Table 1 Continued**

| Craniocaudal Plane Angle | No. | Position of Electrode-Tip (cm) |     |     | Orbital Plane Angle               |       |       |       |       |       |       |
|--------------------------|-----|--------------------------------|-----|-----|-----------------------------------|-------|-------|-------|-------|-------|-------|
|                          |     | Y                              | Z   | X   | 90°                               | 60°   | 30°   | 0°    | -30°  | -60°  | -90°  |
|                          |     |                                |     |     | Ablated Volume (cm <sup>3</sup> ) |       |       |       |       |       |       |
| 30°                      | 376 | 0.2                            | 0.2 | 0.8 | 9.37                              | 9.98  | 9.52  | 9.31  | 9.15  | 9.18  | 9.37  |
|                          | 377 | 0.2                            | 0.4 | 0   | 13.12                             | 12.39 | 12.07 | 12.38 | 13.12 | 13.57 | 13.12 |
|                          | 378 | 0.2                            | 0.4 | 0.2 | 12.23                             | 11.87 | 11.80 | 12.07 | 12.45 | 12.55 | 12.23 |
|                          | 379 | 0.2                            | 0.4 | 0.4 | 11.13                             | 11.00 | 11.06 | 11.24 | 11.38 | 11.32 | 11.13 |
|                          | 380 | 0.2                            | 0.4 | 0.6 | 9.91                              | 9.92  | 10.01 | 10.10 | 10.10 | 10.00 | 9.91  |
|                          | 381 | 0.2                            | 0.4 | 0.8 | 8.61                              | 8.69  | 8.77  | 8.77  | 8.69  | 8.61  | 8.61  |
|                          | 382 | 0.2                            | 0.6 | 0   | 12.64                             | 11.53 | 10.80 | 10.99 | 11.98 | 12.91 | 12.64 |
|                          | 383 | 0.2                            | 0.6 | 0.2 | 11.61                             | 10.94 | 10.54 | 10.76 | 11.42 | 11.88 | 11.61 |
|                          | 384 | 0.2                            | 0.6 | 0.4 | 10.43                             | 10.06 | 9.90  | 10.10 | 10.48 | 10.66 | 10.44 |
|                          | 385 | 0.2                            | 0.6 | 0.6 | 9.17                              | 8.99  | 8.97  | 9.13  | 9.31  | 9.34  | 9.17  |
|                          | 386 | 0.2                            | 0.8 | 0   | 12.07                             | 10.59 | 9.46  | 9.50  | 10.70 | 12.15 | 12.07 |
|                          | 387 | 0.2                            | 0.8 | 0.2 | 10.95                             | 9.96  | 9.20  | 9.31  | 10.21 | 11.10 | 10.95 |
|                          | 388 | 0.2                            | 0.8 | 0.4 | 9.71                              | 9.07  | 8.63  | 8.77  | 9.39  | 9.88  | 9.71  |
|                          | 389 | 0.4                            | 0   | 0   | 12.38                             | 12.73 | 13.57 | 14.05 | 13.57 | 12.73 | 12.38 |
|                          | 390 | 0.4                            | 0   | 0.2 | 12.15                             | 12.75 | 13.54 | 13.57 | 12.81 | 12.17 | 12.14 |
|                          | 391 | 0.4                            | 0   | 0.4 | 11.50                             | 12.22 | 12.73 | 12.38 | 11.64 | 11.25 | 11.51 |
|                          | 392 | 0.4                            | 0   | 0.6 | 10.59                             | 11.32 | 11.55 | 10.99 | 10.31 | 10.13 | 10.59 |
|                          | 393 | 0.4                            | 0   | 0.8 | 9.50                              | 10.20 | 10.20 | 9.50  | 8.87  | 8.87  | 9.51  |
|                          | 394 | 0.4                            | 0.2 | 0   | 12.30                             | 12.09 | 12.62 | 13.57 | 13.94 | 13.15 | 12.30 |
|                          | 395 | 0.4                            | 0.2 | 0.2 | 11.82                             | 11.92 | 12.52 | 13.12 | 12.99 | 12.30 | 11.81 |
|                          | 396 | 0.4                            | 0.2 | 0.4 | 11.00                             | 11.31 | 11.85 | 12.07 | 11.72 | 11.19 | 11.00 |
|                          | 397 | 0.4                            | 0.2 | 0.6 | 9.98                              | 10.40 | 10.81 | 10.76 | 10.32 | 9.94  | 9.98  |
|                          | 398 | 0.4                            | 0.2 | 0.8 | -5215                             | 9.30  | 9.56  | 9.31  | 8.84  | 8.60  | 8.82  |
|                          | 399 | 0.4                            | 0.4 | 0   | 12.07                             | 11.31 | 11.44 | 12.38 | 13.45 | 13.23 | 12.07 |
|                          | 400 | 0.4                            | 0.4 | 0.2 | 11.40                             | 11.00 | 11.31 | 12.07 | 12.56 | 12.15 | 11.37 |
|                          | 401 | 0.4                            | 0.4 | 0.4 | 10.43                             | 10.35 | 10.73 | 11.24 | 11.35 | 10.92 | 10.43 |
|                          | 402 | 0.4                            | 0.4 | 0.6 | 9.33                              | 9.44  | 9.82  | 10.10 | 9.99  | 9.60  | 9.33  |
|                          | 403 | 0.4                            | 0.6 | 0   | 11.71                             | 10.44 | 10.14 | 10.99 | 12.45 | 12.94 | 11.71 |
|                          | 404 | 0.4                            | 0.6 | 0.2 | 10.86                             | 10.04 | 10.00 | 10.76 | 11.71 | 11.77 | 10.86 |
|                          | 405 | 0.4                            | 0.6 | 0.4 | 9.81                              | 9.35  | 9.48  | 10.10 | 10.62 | 10.47 | 9.81  |
|                          | 406 | 0.4                            | 0.8 | 0   | 11.25                             | 9.51  | 8.77  | 9.50  | 11.25 | 12.39 | 11.24 |
|                          | 407 | 0.4                            | 0.8 | 0.2 | 10.27                             | 9.03  | 8.61  | 9.31  | 10.61 | 11.17 | 10.27 |
|                          | 408 | 0.6                            | 0   | 0   | 10.92                             | 11.57 | 13.02 | 14.05 | 13.02 | 11.57 | 9.37  |
|                          | 409 | 0.6                            | 0   | 0.2 | 10.81                             | 11.71 | 13.17 | 13.57 | 12.23 | 11.03 | 10.82 |
|                          | 410 | 0.6                            | 0   | 0.4 | 10.31                             | 12.00 | 12.59 | 12.38 | 11.09 | 10.83 | 10.31 |
|                          | 411 | 0.6                            | 0   | 0.6 | 9.55                              | 10.72 | 11.56 | 10.99 | 9.78  | 9.14  | 9.55  |
|                          | 412 | 0.6                            | 0.2 | 0   | 10.93                             | 10.90 | 11.98 | 13.57 | 13.67 | 12.09 | 10.93 |
|                          | 413 | 0.6                            | 0.2 | 0.2 | 10.56                             | 10.86 | 12.02 | 13.12 | 12.64 | 11.32 | 10.56 |
|                          | 414 | 0.6                            | 0.2 | 0.4 | 9.90                              | 10.45 | 11.54 | 12.07 | 11.35 | 10.30 | 9.90  |
|                          | 415 | 0.6                            | 0.2 | 0.6 | 9.02                              | 9.74  | 10.65 | 10.76 | 9.94  | 9.16  | 9.02  |
|                          | 416 | 0.6                            | 0.4 | 0   | 10.76                             | 10.10 | 10.76 | 12.39 | 13.57 | 12.39 | 10.76 |
|                          | 417 | 0.6                            | 0.4 | 0.2 | 10.21                             | 9.93  | 10.75 | 12.07 | 12.50 | 11.39 | 10.21 |

**Supplementary Table 1 Continued**

| Craniocaudal Plane Angle | No. | Position of Electrode-Tip (cm) |     |     | Orbital Plane Angle               |       |       |       |       |       |       |
|--------------------------|-----|--------------------------------|-----|-----|-----------------------------------|-------|-------|-------|-------|-------|-------|
|                          |     | Y                              | Z   | X   | 90°                               | 60°   | 30°   | 0°    | -30°  | -60°  | -90°  |
|                          |     |                                |     |     | Ablated Volume (cm <sup>3</sup> ) |       |       |       |       |       |       |
| 30°                      | 418 | 0.6                            | 0.4 | 0.4 | 9.42                              | 9.46  | 10.32 | 11.24 | 11.19 | 10.22 | 9.42  |
|                          | 419 | 0.6                            | 0.4 | 0.6 | 8.44                              | 8.72  | 9.54  | 10.10 | 9.77  | 8.93  | 8.44  |
|                          | 420 | 0.6                            | 0.6 | 0   | 10.48                             | 9.23  | 9.44  | 10.99 | 12.80 | 12.41 | 10.48 |
|                          | 421 | 0.6                            | 0.6 | 0.2 | 9.78                              | 8.97  | 9.39  | 10.76 | 11.87 | 11.25 | 9.78  |
|                          | 422 | 0.6                            | 0.6 | 0.4 | 8.87                              | 8.43  | 9.00  | 10.10 | 9.79  | 9.96  | 8.87  |
|                          | 423 | 0.6                            | 0.8 | 0   | 9.50                              | 10.32 | 12.39 | 14.05 | 12.39 | 10.32 | 9.50  |
|                          | 424 | 0.6                            | 0.8 | 0.2 | 9.36                              | 10.52 | 12.66 | 13.57 | 11.60 | 9.79  | 9.36  |
|                          | 425 | 0.6                            | 0.8 | 0.4 | 7.83                              | 10.36 | 12.29 | 12.38 | 10.49 | 9.00  | 8.95  |
|                          | 426 | 0.8                            | 0   | 0   | 9.45                              | 9.61  | 11.29 | 13.57 | 13.20 | 10.89 | 9.45  |
|                          | 427 | 0.8                            | 0   | 0.2 | 9.15                              | 9.67  | 11.44 | 13.12 | 12.16 | 10.18 | 9.15  |
|                          | 428 | 0.8                            | 0   | 0.4 | 8.60                              | 9.41  | 11.11 | 12.07 | 10.89 | 9.23  | 8.60  |
|                          | 429 | 0.8                            | 0.2 | 0   | 9.31                              | 8.82  | 10.05 | 12.39 | 12.54 | 11.31 | 9.31  |
|                          | 430 | 0.8                            | 0.2 | 0.2 | 8.86                              | 8.75  | 10.12 | 12.07 | 12.27 | 10.40 | 8.86  |
| 60°                      | 431 | 0                              | 0   | 0   | 14.05                             | 14.05 | 14.05 | 14.05 | 14.05 | 14.05 | 14.05 |
|                          | 432 | 0                              | 0   | 0.2 | 13.57                             | 13.57 | 13.57 | 13.57 | 13.57 | 13.57 | 13.57 |
|                          | 433 | 0                              | 0   | 0.4 | 12.38                             | 12.39 | 12.38 | 12.38 | 12.39 | 12.39 | 12.38 |
|                          | 434 | 0                              | 0   | 0.6 | 10.99                             | 10.99 | 10.99 | 10.99 | 11.00 | 10.99 | 10.99 |
|                          | 435 | 0                              | 0   | 0.8 | 9.50                              | 9.50  | 9.50  | 9.50  | 9.50  | 9.50  | 9.50  |
|                          | 436 | 0                              | 0.2 | 0   | 14.05                             | 13.98 | 13.70 | 13.57 | 13.70 | 13.97 | 14.05 |
|                          | 437 | 0                              | 0.2 | 0.2 | 13.57                             | 13.45 | 13.23 | 13.12 | 13.23 | 13.36 | 13.57 |
|                          | 438 | 0                              | 0.2 | 0.4 | 12.38                             | 12.30 | 12.15 | 12.07 | 12.15 | 12.30 | 12.38 |
|                          | 439 | 0                              | 0.2 | 0.6 | 10.99                             | 10.93 | 10.81 | 10.76 | 10.82 | 10.93 | 10.99 |
|                          | 440 | 0                              | 0.2 | 0.8 | 9.50                              | 9.45  | 9.36  | 9.31  | 9.36  | 9.45  | 9.50  |
|                          | 441 | 0                              | 0.4 | 0   | 14.05                             | 13.57 | 12.73 | 12.38 | 12.73 | 13.57 | 14.05 |
|                          | 442 | 0                              | 0.4 | 0.2 | 13.57                             | 13.12 | 12.39 | 12.07 | 12.39 | 13.12 | 13.57 |
|                          | 443 | 0                              | 0.4 | 0.4 | 12.38                             | 12.07 | 11.50 | 11.24 | 11.51 | 12.07 | 12.38 |
|                          | 444 | 0                              | 0.4 | 0.6 | 10.99                             | 10.76 | 10.31 | 10.10 | 10.22 | 10.76 | 10.99 |
|                          | 445 | 0                              | 0.4 | 0.8 | 9.50                              | 9.31  | 8.95  | 8.77  | 8.95  | 9.31  | 9.50  |
|                          | 446 | 0                              | 0.6 | 0   | 14.05                             | 13.02 | 11.57 | 10.99 | 11.57 | 13.02 | 14.05 |
|                          | 447 | 0                              | 0.6 | 0.2 | 13.57                             | 12.64 | 11.31 | 10.76 | 12.91 | 12.64 | 13.57 |
|                          | 448 | 0                              | 0.6 | 0.4 | 12.38                             | 11.71 | 10.59 | 10.10 | 10.59 | 11.71 | 12.38 |
|                          | 449 | 0                              | 0.6 | 0.6 | 10.99                             | 10.48 | 9.55  | 9.13  | 9.55  | 13.48 | 10.99 |
|                          | 450 | 0                              | 0.8 | 0   | 14.05                             | 12.38 | 10.32 | 9.50  | 10.31 | 12.39 | 14.05 |
|                          | 451 | 0                              | 0.8 | 0.2 | 13.57                             | 12.07 | 10.10 | 9.31  | 10.10 | 12.07 | 13.57 |
|                          | 452 | 0                              | 0.8 | 0.4 | 12.38                             | 11.24 | 9.51  | 8.77  | 9.51  | 11.24 | 12.38 |
|                          | 453 | 0.2                            | 0   | 0   | 13.61                             | 13.71 | 13.98 | 14.05 | 13.98 | 13.70 | 13.57 |
|                          | 454 | 0.2                            | 0   | 0.2 | 13.12                             | 13.23 | 13.45 | 13.57 | 13.45 | 13.23 | 13.12 |
|                          | 455 | 0.2                            | 0   | 0.4 | 12.07                             | 12.15 | 12.31 | 12.38 | 12.30 | 12.15 | 12.07 |
|                          | 456 | 0.2                            | 0   | 0.6 | 10.76                             | 10.82 | 10.93 | 10.99 | 10.93 | 10.81 | 10.76 |
|                          | 457 | 0.2                            | 0   | 0.8 | 9.31                              | 9.36  | 9.45  | 9.50  | 9.45  | 9.36  | 9.31  |
|                          | 458 | 0.2                            | 0.2 | 0   | 13.57                             | 14.03 | 14.03 | 13.57 | 13.17 | 13.18 | 13.57 |
|                          | 459 | 0.2                            | 0.2 | 0.2 | 13.12                             | 13.51 | 13.51 | 13.12 | 12.78 | 12.78 | 13.12 |

**Supplementary Table 1 Continued**

| Craniocaudal Plane | No. | Position of Electrode-Tip (cm) |     |     | Orbital Plane Angle               |       |       |       |       |       |       |
|--------------------|-----|--------------------------------|-----|-----|-----------------------------------|-------|-------|-------|-------|-------|-------|
|                    |     | Y                              | Z   | X   | 90°                               | 60°   | 30°   | 0°    | -30°  | -60°  | -90°  |
|                    |     |                                |     |     | Ablated Volume (cm <sup>3</sup> ) |       |       |       |       |       |       |
| 60°                | 460 | 0.2                            | 0.2 | 0.4 | 12.07                             | 12.34 | 12.34 | 12.07 | 11.81 | 11.82 | 12.07 |
|                    | 461 | 0.2                            | 0.2 | 0.6 | 10.76                             | 10.96 | 10.96 | 10.76 | 10.56 | 10.56 | 10.76 |
|                    | 462 | 0.2                            | 0.2 | 0.8 | 9.31                              | 9.50  | 9.47  | 9.31  | 9.15  | 9.15  | 9.31  |
|                    | 463 | 0.2                            | 0.4 | 0   | 13.57                             | 14.05 | 13.33 | 12.38 | 12.08 | 12.57 | 13.57 |
|                    | 464 | 0.2                            | 0.4 | 0.2 | 13.12                             | 13.56 | 12.92 | 12.07 | 11.78 | 12.23 | 13.12 |
|                    | 465 | 0.2                            | 0.4 | 0.4 | 12.07                             | 12.38 | 11.92 | 11.24 | 11.00 | 11.38 | 12.07 |
|                    | 466 | 0.2                            | 0.4 | 0.6 | 10.76                             | 10.99 | 10.66 | 10.10 | 9.90  | 10.21 | 10.76 |
|                    | 467 | 0.2                            | 0.4 | 0.8 | 9.31                              | 9.50  | 9.21  | 8.77  | 8.60  | 8.86  | 9.31  |
|                    | 468 | 0.2                            | 0.6 | 0   | 13.57                             | 13.89 | 12.26 | 10.99 | 10.86 | 11.89 | 13.57 |
|                    | 469 | 0.2                            | 0.6 | 0.2 | 13.12                             | 13.38 | 11.95 | 10.76 | 10.62 | 11.61 | 13.12 |
|                    | 470 | 0.2                            | 0.6 | 0.4 | 12.07                             | 12.25 | 11.14 | 10.10 | 9.98  | 10.86 | 12.07 |
|                    | 471 | 0.2                            | 0.6 | 0.6 | 10.76                             | 10.90 | 10.02 | 9.13  | 9.02  | 9.77  | 10.76 |
|                    | 472 | 0.2                            | 0.8 | 0   | 13.57                             | 13.44 | 11.05 | 9.50  | 9.56  | 11.19 | 13.57 |
|                    | 473 | 0.2                            | 0.8 | 0.2 | 13.12                             | 13.00 | 10.81 | 9.31  | 9.37  | 10.95 | 13.12 |
|                    | 474 | 0.2                            | 0.8 | 0.4 | 12.07                             | 11.98 | 10.15 | 8.77  | 8.82  | 10.27 | 12.07 |
|                    | 475 | 0.4                            | 0   | 0   | 12.38                             | 12.73 | 13.57 | 14.05 | 13.57 | 12.73 | 12.38 |
|                    | 476 | 0.4                            | 0   | 0.2 | 12.07                             | 12.39 | 13.12 | 13.57 | 13.12 | 12.39 | 12.07 |
|                    | 477 | 0.4                            | 0   | 0.4 | 11.24                             | 11.50 | 12.07 | 12.38 | 12.07 | 11.50 | 11.24 |
|                    | 478 | 0.4                            | 0   | 0.6 | 10.10                             | 10.32 | 10.76 | 10.99 | 10.76 | 10.31 | 10.10 |
|                    | 479 | 0.4                            | 0   | 0.8 | 8.77                              | 8.95  | 9.31  | 9.50  | 9.31  | 8.95  | 8.77  |
|                    | 480 | 0.4                            | 0.2 | 0   | 12.38                             | 13.33 | 14.05 | 13.57 | 12.56 | 12.08 | 12.38 |
|                    | 481 | 0.4                            | 0.2 | 0.2 | 12.07                             | 12.91 | 13.56 | 13.12 | 12.23 | 11.78 | 12.07 |
|                    | 482 | 0.4                            | 0.2 | 0.4 | 11.24                             | 11.91 | 12.38 | 12.07 | 11.38 | 11.00 | 11.24 |
|                    | 483 | 0.4                            | 0.2 | 0.6 | 10.10                             | 10.64 | 10.99 | 10.76 | 10.21 | 9.90  | 10.10 |
|                    | 484 | 0.4                            | 0.2 | 0.8 | 8.77                              | 9.22  | 9.50  | 9.31  | 8.86  | 8.60  | 8.77  |
|                    | 485 | 0.4                            | 0.4 | 0   | 12.38                             | 13.81 | 13.81 | 12.38 | 11.38 | 11.38 | 12.38 |
|                    | 486 | 0.4                            | 0.4 | 0.2 | 12.07                             | 13.32 | 13.32 | 12.07 | 11.13 | 11.13 | 12.07 |
|                    | 487 | 0.4                            | 0.4 | 0.4 | 11.24                             | 12.21 | 12.21 | 11.24 | 10.43 | 10.43 | 11.24 |
|                    | 488 | 0.4                            | 0.4 | 0.6 | 10.10                             | 10.87 | 10.86 | 10.10 | 9.42  | 9.41  | 10.10 |
|                    | 489 | 0.4                            | 0.6 | 0   | 12.38                             | 14.05 | 12.90 | 10.99 | 10.11 | 10.65 | 12.38 |
|                    | 490 | 0.4                            | 0.6 | 0.2 | 12.07                             | 13.54 | 12.54 | 10.76 | 9.91  | 10.43 | 12.07 |
|                    | 491 | 0.4                            | 0.6 | 0.4 | 11.24                             | 12.37 | 11.62 | 10.10 | 9.33  | 9.81  | 11.24 |
|                    | 492 | 0.4                            | 0.8 | 0   | 12.38                             | 14.05 | 11.76 | 11.50 | 8.79  | 9.92  | 12.38 |
|                    | 493 | 0.4                            | 0.8 | 0.2 | 12.07                             | 13.53 | 11.49 | 9.31  | 8.61  | 9.71  | 12.07 |
|                    | 494 | 0.6                            | 0   | 0   | 10.99                             | 11.57 | 13.02 | 14.05 | 13.02 | 11.57 | 10.99 |
|                    | 495 | 0.6                            | 0   | 0.2 | 10.76                             | 11.29 | 12.65 | 13.57 | 12.65 | 11.31 | 10.76 |
|                    | 496 | 0.6                            | 0   | 0.4 | 10.10                             | 10.59 | 11.71 | 12.38 | 11.71 | 10.59 | 10.10 |
|                    | 497 | 0.6                            | 0   | 0.6 | 9.13                              | 9.55  | 10.48 | 10.99 | 10.48 | 9.55  | 9.13  |
|                    | 498 | 0.6                            | 0.2 | 0   | 10.99                             | 12.26 | 13.89 | 13.57 | 11.90 | 10.86 | 10.99 |
|                    | 499 | 0.6                            | 0.2 | 0.2 | 10.76                             | 11.95 | 13.38 | 13.12 | 11.61 | 10.62 | 10.76 |
|                    | 500 | 0.6                            | 0.2 | 0.4 | 10.10                             | 11.14 | 12.26 | 12.07 | 10.86 | 9.98  | 10.10 |
|                    | 501 | 0.6                            | 0.2 | 0.6 | 9.13                              | 10.02 | 10.90 | 10.76 | 9.78  | 9.02  | 9.13  |

**Supplementary Table 1 Continued**

| Craniocaudal Plane Angle | No. | Position of Electrode-Tip (cm) |     |     | Orbital Plane Angle               |       |       |       |       |       |       |
|--------------------------|-----|--------------------------------|-----|-----|-----------------------------------|-------|-------|-------|-------|-------|-------|
|                          |     | Y                              | Z   | X   | 90°                               | 60°   | 30°   | 0°    | -30°  | -60°  | -90°  |
|                          |     |                                |     |     | Ablated Volume (cm <sup>3</sup> ) |       |       |       |       |       |       |
| 60°                      | 502 | 0.6                            | 0.4 | 0   | 10.99                             | 12.90 | 14.05 | 12.38 | 10.66 | 10.11 | 10.99 |
|                          | 503 | 0.6                            | 0.4 | 0.2 | 10.76                             | 12.54 | 13.54 | 12.07 | 10.44 | 9.91  | 10.76 |
|                          | 504 | 0.6                            | 0.4 | 0.4 | 10.10                             | 11.62 | 12.37 | 11.24 | 9.81  | 9.32  | 10.10 |
|                          | 505 | 0.6                            | 0.4 | 0.6 | 9.13                              | 10.41 | 10.98 | 10.10 | 8.87  | 8.44  | 9.13  |
|                          | 506 | 0.6                            | 0.6 | 0   | 10.99                             | 13.47 | 13.47 | 10.99 | 9.36  | 9.36  | 10.99 |
|                          | 507 | 0.6                            | 0.6 | 0.2 | 10.76                             | 13.03 | 13.03 | 10.76 | 9.17  | 9.17  | 10.76 |
|                          | 508 | 0.6                            | 0.6 | 0.4 | 10.10                             | 12.01 | 12.01 | 10.10 | 8.63  | 8.63  | 10.10 |
|                          | 509 | 0.8                            | 0   | 0   | 9.50                              | 10.32 | 12.38 | 14.05 | 12.39 | 10.32 | 9.50  |
|                          | 510 | 0.8                            | 0   | 0.2 | 9.31                              | 10.10 | 12.07 | 13.57 | 12.07 | 10.10 | 9.31  |
|                          | 511 | 0.8                            | 0   | 0.4 | 8.77                              | 9.50  | 11.24 | 12.38 | 11.24 | 9.50  | 8.77  |
|                          | 512 | 0.8                            | 0.2 | 0   | 9.50                              | 11.05 | 13.44 | 13.57 | 11.19 | 9.56  | 9.50  |
|                          | 513 | 0.8                            | 0.2 | 0.2 | 9.31                              | 10.81 | 13.00 | 13.12 | 10.95 | 9.37  | 9.31  |
|                          | 514 | 0.8                            | 0.2 | 0.4 | 8.77                              | 10.15 | 11.99 | 12.07 | 10.27 | 8.82  | 8.77  |
|                          | 515 | 0.8                            | 0.4 | 0   | 9.50                              | 11.76 | 14.05 | 12.38 | 9.91  | 8.78  | 9.50  |
|                          | 516 | 0.8                            | 0.4 | 0.2 | 9.31                              | 11.48 | 13.53 | 12.07 | 9.71  | 8.61  | 9.31  |
| 90°                      | 517 | 0                              | 0   | 0   | 14.05                             | 14.05 | 14.05 | 14.05 | 14.05 | 14.05 | 14.05 |
|                          | 518 | 0                              | 0   | 0.2 | 13.57                             | 13.57 | 13.57 | 13.57 | 13.57 | 13.57 | 13.57 |
|                          | 519 | 0                              | 0   | 0.4 | 12.38                             | 12.38 | 12.38 | 12.38 | 12.38 | 12.38 | 12.38 |
|                          | 520 | 0                              | 0   | 0.6 | 10.99                             | 10.99 | 10.99 | 10.99 | 10.99 | 10.99 | 10.99 |
|                          | 521 | 0                              | 0   | 0.8 | 9.50                              | 9.50  | 9.50  | 9.50  | 9.50  | 9.50  | 9.50  |
|                          | 522 | 0                              | 0.2 | 0   | 14.05                             | 13.97 | 13.70 | 13.57 | 13.70 | 13.98 | 14.05 |
|                          | 523 | 0                              | 0.2 | 0.2 | 13.57                             | 13.45 | 13.23 | 13.12 | 13.23 | 13.45 | 13.57 |
|                          | 524 | 0                              | 0.2 | 0.4 | 12.38                             | 12.30 | 12.15 | 12.07 | 12.14 | 12.30 | 12.38 |
|                          | 525 | 0                              | 0.2 | 0.6 | 10.99                             | 10.93 | 10.82 | 10.76 | 10.81 | 10.93 | 10.99 |
|                          | 526 | 0                              | 0.2 | 0.8 | 9.50                              | 9.45  | 9.36  | 9.31  | 9.36  | 9.45  | 9.50  |
|                          | 527 | 0                              | 0.4 | 0   | 14.05                             | 13.57 | 12.73 | 12.38 | 12.73 | 13.57 | 14.05 |
|                          | 528 | 0                              | 0.4 | 0.2 | 13.57                             | 13.12 | 12.39 | 12.07 | 12.39 | 13.12 | 13.57 |
|                          | 529 | 0                              | 0.4 | 0.4 | 12.38                             | 12.07 | 11.50 | 11.24 | 11.50 | 12.07 | 12.38 |
|                          | 530 | 0                              | 0.4 | 0.6 | 10.99                             | 10.76 | 10.31 | 10.10 | 10.32 | 10.76 | 10.99 |
|                          | 531 | 0                              | 0.4 | 0.8 | 9.50                              | 9.31  | 8.95  | 8.77  | 8.95  | 9.31  | 9.50  |
|                          | 532 | 0                              | 0.6 | 0   | 14.05                             | 13.02 | 11.57 | 10.99 | 11.57 | 13.02 | 14.05 |
|                          | 533 | 0                              | 0.6 | 0.2 | 13.57                             | 12.64 | 11.31 | 10.76 | 11.31 | 12.64 | 13.57 |
|                          | 534 | 0                              | 0.6 | 0.4 | 12.38                             | 11.71 | 10.59 | 10.10 | 10.59 | 11.71 | 12.38 |
|                          | 535 | 0                              | 0.6 | 0.6 | 10.99                             | 10.48 | 9.55  | 9.13  | 9.55  | 10.48 | 10.99 |
|                          | 536 | 0                              | 0.8 | 0   | 14.05                             | 12.39 | 10.31 | 9.50  | 10.32 | 12.39 | 14.05 |
|                          | 537 | 0                              | 0.8 | 0.2 | 13.57                             | 12.07 | 10.10 | 9.31  | 10.10 | 12.07 | 13.57 |
|                          | 538 | 0                              | 0.8 | 0.4 | 12.38                             | 11.24 | 9.51  | 8.77  | 9.50  | 11.24 | 12.38 |
|                          | 539 | 0.2                            | 0   | 0   | 13.57                             | 13.70 | 13.98 | 14.05 | 13.97 | 13.70 | 13.57 |
|                          | 540 | 0.2                            | 0   | 0.2 | 13.12                             | 13.23 | 13.45 | 13.57 | 13.45 | 13.23 | 13.12 |
|                          | 541 | 0.2                            | 0   | 0.4 | 12.07                             | 12.14 | 12.30 | 12.38 | 12.30 | 12.15 | 12.07 |
|                          | 542 | 0.2                            | 0   | 0.6 | 10.76                             | 10.81 | 10.93 | 10.99 | 10.93 | 10.81 | 10.76 |
|                          | 543 | 0.2                            | 0   | 0.8 | 9.31                              | 9.36  | 9.45  | 9.50  | 9.45  | 9.36  | 9.31  |

**Supplementary Table 1 Continued**

| Craniocaudal Plane Angle | No. | Position of Electrode-Tip (cm) |     |     | Orbital Plane Angle               |       |       |       |       |       |       |
|--------------------------|-----|--------------------------------|-----|-----|-----------------------------------|-------|-------|-------|-------|-------|-------|
|                          |     | Y                              | Z   | X   | 90°                               | 60°   | 30°   | 0°    | -30°  | -60°  | -90°  |
|                          |     |                                |     |     | Ablated Volume (cm <sup>3</sup> ) |       |       |       |       |       |       |
| 90°                      | 544 | 0.2                            | 0.2 | 0   | 13.57                             | 13.18 | 13.17 | 13.57 | 14.03 | 14.03 | 13.57 |
|                          | 545 | 0.2                            | 0.2 | 0.2 | 13.12                             | 12.78 | 12.78 | 13.12 | 13.51 | 13.51 | 13.12 |
|                          | 546 | 0.2                            | 0.2 | 0.4 | 12.07                             | 11.82 | 11.81 | 12.07 | 12.34 | 12.34 | 12.07 |
|                          | 547 | 0.2                            | 0.2 | 0.6 | 10.76                             | 10.56 | 10.56 | 10.76 | 10.96 | 10.96 | 10.76 |
|                          | 548 | 0.2                            | 0.2 | 0.8 | 9.31                              | 9.15  | 9.15  | 9.31  | 9.48  | 9.47  | 9.31  |
|                          | 549 | 0.2                            | 0.4 | 0   | 13.57                             | 12.57 | 12.08 | 12.38 | 13.33 | 14.05 | 13.57 |
|                          | 550 | 0.2                            | 0.4 | 0.2 | 13.12                             | 12.23 | 11.78 | 12.07 | 12.91 | 13.56 | 13.12 |
|                          | 551 | 0.2                            | 0.4 | 0.4 | 12.07                             | 11.38 | 11.00 | 11.24 | 11.91 | 12.38 | 12.07 |
|                          | 552 | 0.2                            | 0.4 | 0.6 | 10.76                             | 10.21 | 9.90  | 10.10 | 10.64 | 10.99 | 10.76 |
|                          | 553 | 0.2                            | 0.4 | 0.8 | 9.31                              | 8.86  | 8.60  | 8.77  | 9.21  | 9.50  | 9.31  |
|                          | 554 | 0.2                            | 0.6 | 0   | 13.57                             | 11.89 | 10.86 | 10.99 | 12.26 | 13.89 | 13.57 |
|                          | 555 | 0.2                            | 0.6 | 0.2 | 13.12                             | 11.61 | 10.62 | 10.76 | 11.95 | 13.38 | 13.12 |
|                          | 556 | 0.2                            | 0.6 | 0.4 | 12.07                             | 10.86 | 9.98  | 10.10 | 11.14 | 12.25 | 12.07 |
|                          | 557 | 0.2                            | 0.6 | 0.6 | 10.76                             | 9.77  | 9.02  | 9.13  | 10.02 | 10.90 | 10.76 |
|                          | 558 | 0.2                            | 0.8 | 0   | 13.57                             | 11.19 | 9.56  | 9.50  | 11.05 | 13.44 | 13.57 |
|                          | 559 | 0.2                            | 0.8 | 0.2 | 13.12                             | 10.95 | 9.37  | 9.31  | 10.81 | 13.00 | 13.12 |
|                          | 560 | 0.2                            | 0.8 | 0.4 | 12.07                             | 10.27 | 8.82  | 8.77  | 10.15 | 11.98 | 12.07 |
|                          | 561 | 0.4                            | 0   | 0   | 12.38                             | 12.73 | 13.57 | 14.05 | 13.57 | 12.73 | 12.38 |
|                          | 562 | 0.4                            | 0   | 0.2 | 12.07                             | 12.38 | 13.12 | 13.57 | 13.12 | 12.39 | 12.07 |
|                          | 563 | 0.4                            | 0   | 0.4 | 11.24                             | 11.50 | 12.07 | 12.38 | 12.07 | 11.50 | 11.24 |
|                          | 564 | 0.4                            | 0   | 0.6 | 10.10                             | 10.32 | 10.76 | 10.99 | 10.76 | 10.31 | 10.10 |
|                          | 565 | 0.4                            | 0   | 0.8 | 8.77                              | 8.95  | 9.31  | 9.50  | 9.31  | 8.95  | 8.77  |
|                          | 566 | 0.4                            | 0.2 | 0   | 12.38                             | 12.08 | 12.56 | 13.57 | 14.05 | 13.33 | 12.38 |
|                          | 567 | 0.4                            | 0.2 | 0.2 | 12.07                             | 11.78 | 12.23 | 13.12 | 13.56 | 12.91 | 12.07 |
|                          | 568 | 0.4                            | 0.2 | 0.4 | 11.24                             | 11.00 | 11.38 | 12.07 | 12.38 | 11.92 | 11.24 |
|                          | 569 | 0.4                            | 0.2 | 0.6 | 10.10                             | 9.90  | 10.21 | 10.76 | 10.99 | 10.64 | 10.10 |
|                          | 570 | 0.4                            | 0.2 | 0.8 | 8.77                              | 8.60  | 8.86  | 9.31  | 9.50  | 9.22  | 8.77  |
|                          | 571 | 0.4                            | 0.4 | 0   | 12.38                             | 11.38 | 11.38 | 12.38 | 13.81 | 13.81 | 12.38 |
|                          | 572 | 0.4                            | 0.4 | 0.2 | 12.07                             | 11.13 | 11.13 | 12.07 | 13.32 | 13.32 | 12.07 |
|                          | 573 | 0.4                            | 0.4 | 0.4 | 11.24                             | 10.43 | 10.43 | 11.24 | 12.21 | 12.21 | 11.24 |
|                          | 574 | 0.4                            | 0.4 | 0.6 | 10.10                             | 9.41  | 9.42  | 10.10 | 10.86 | 10.87 | 10.10 |
|                          | 575 | 0.4                            | 0.6 | 0   | 12.38                             | 10.65 | 10.11 | 10.99 | 12.90 | 14.05 | 12.38 |
|                          | 576 | 0.4                            | 0.6 | 0.2 | 12.07                             | 10.43 | 9.91  | 10.76 | 12.54 | 13.54 | 12.07 |
|                          | 577 | 0.4                            | 0.6 | 0.4 | 11.24                             | 9.80  | 9.33  | 10.10 | 11.63 | 12.37 | 11.24 |
|                          | 578 | 0.4                            | 0.8 | 0   | 12.38                             | 9.92  | 8.79  | 9.50  | 11.76 | 14.05 | 12.38 |
|                          | 579 | 0.4                            | 0.8 | 0.2 | 12.07                             | 9.71  | 8.61  | 9.31  | 11.48 | 13.53 | 12.07 |
|                          | 580 | 0.6                            | 0   | 0   | 10.99                             | 11.57 | 13.02 | 14.05 | 13.02 | 11.57 | 10.99 |
|                          | 581 | 0.6                            | 0   | 0.2 | 10.76                             | 11.31 | 12.64 | 13.57 | 12.64 | 11.31 | 10.76 |
|                          | 582 | 0.6                            | 0   | 0.4 | 10.10                             | 10.59 | 11.71 | 12.38 | 11.71 | 10.59 | 10.10 |
|                          | 583 | 0.6                            | 0   | 0.6 | 9.13                              | 9.55  | 10.48 | 10.99 | 10.48 | 9.55  | 9.13  |
|                          | 584 | 0.6                            | 0.2 | 0   | 10.99                             | 10.86 | 11.90 | 13.57 | 13.89 | 12.26 | 10.99 |
|                          | 585 | 0.6                            | 0.2 | 0.2 | 10.76                             | 10.62 | 11.61 | 13.12 | 13.38 | 11.95 | 10.76 |

**Supplementary Table 1 Continued**

| Craniocaudal Plane | No. | Position of Electrode-Tip (cm) |     |     | Orbital Plane (degree)            |       |       |       |       |       |       |
|--------------------|-----|--------------------------------|-----|-----|-----------------------------------|-------|-------|-------|-------|-------|-------|
|                    |     | Y                              | Z   | X   | 90°                               | 60°   | 30°   | 0°    | -30°  | -60°  | -90°  |
|                    |     |                                |     |     | Ablated Volume (cm <sup>3</sup> ) |       |       |       |       |       |       |
| 90°                | 586 | 0.6                            | 0.2 | 0.4 | 10.10                             | 9.98  | 10.86 | 12.07 | 12.25 | 11.14 | 10.10 |
|                    | 587 | 0.6                            | 0.2 | 0.6 | 9.13                              | 9.02  | 9.78  | 10.92 | 10.90 | 10.02 | 9.13  |
|                    | 588 | 0.6                            | 0.4 | 0   | 10.99                             | 10.11 | 10.66 | 12.38 | 14.05 | 12.90 | 10.99 |
|                    | 589 | 0.6                            | 0.4 | 0.2 | 10.76                             | 9.91  | 10.44 | 12.07 | 13.54 | 12.54 | 10.76 |
|                    | 590 | 0.6                            | 0.4 | 0.4 | 10.10                             | 9.32  | 9.81  | 11.24 | 12.37 | 11.62 | 10.10 |
|                    | 591 | 0.6                            | 0.4 | 0.6 | 9.13                              | 8.43  | 9.78  | 10.10 | 10.98 | 10.04 | 9.13  |
|                    | 592 | 0.6                            | 0.6 | 0   | 10.99                             | 9.35  | 9.36  | 10.99 | 13.47 | 13.47 | 10.99 |
|                    | 593 | 0.6                            | 0.6 | 0.2 | 10.76                             | 9.17  | 9.17  | 10.76 | 13.03 | 13.03 | 10.76 |
|                    | 594 | 0.6                            | 0.6 | 0.4 | 10.10                             | 8.63  | 8.63  | 10.10 | 12.01 | 12.01 | 10.10 |
|                    | 595 | 0.6                            | 0.8 | 0   | 9.50                              | 10.32 | 12.39 | 14.05 | 12.38 | 10.32 | 9.50  |
|                    | 596 | 0.6                            | 0.8 | 0.2 | 9.31                              | 10.10 | 12.07 | 13.57 | 12.07 | 10.10 | 9.31  |
|                    | 597 | 0.6                            | 0.8 | 0.4 | 8.77                              | 9.50  | 11.24 | 12.38 | 11.24 | 9.50  | 8.77  |
|                    | 598 | 0.8                            | 0   | 0   | 9.50                              | 9.56  | 11.19 | 13.57 | 13.44 | 11.05 | 9.50  |
|                    | 599 | 0.8                            | 0   | 0.2 | 9.31                              | 9.37  | 10.95 | 13.12 | 13.00 | 10.81 | 9.31  |
|                    | 600 | 0.8                            | 0   | 0.4 | 8.77                              | 8.82  | 10.27 | 12.07 | 11.99 | 10.14 | 8.77  |
|                    | 601 | 0.8                            | 0.2 | 0   | 9.50                              | 8.79  | 9.91  | 12.38 | 14.05 | 11.76 | 9.50  |
|                    | 602 | 0.8                            | 0.2 | 0.2 | 9.31                              | 8.61  | 9.71  | 12.07 | 13.53 | 11.48 | 9.31  |
